# Supplementary material for: Drivers and decoupling analysis of carbon emissions in the non-ferrous metal industry-evidence from 28 provinces in China
Source: PeerJ. 2023 Dec 14;11:e16575. doi: 10.7717/peerj.16575 (PMC10725673; doi:10.7717/peerj.16575)
Supplement: Supplemental Information 1 [file peerj-11-16575-s001.xlsx]

## Sheet: Sheet1
pro	year	margins	populations	production	cost	energy_structure	co2	carbon_intensity	eg	lnco2	lnproduction	lncost	lnenergy_structure	lneg	lncarbon_intensity	pros	lnpopulations	lnmargins	lneg_etotal2	y2	y3	y4	y5	y6	y7	y8	y9	y10	y11	y12	y13	y14	y15	y16	y17	y18	y19	y20
shanghai	2000	11.8953	5.01	13.14		0.362814	26.7609	2.0366	4.28515	3.28694	2.57566		-1.01386	1.45515	0.711279	shanghai	1.61144	2.47614	1.02792	0	0	0	0	0	0	0	0	0	0	0	0	0	0	0	0	0	0	0
shanghai	2001	74.6536	15.77	10.16	86.1253	0.418922	22.7036	2.23461	4.24927	3.12252	2.31846	4.4558	-0.870071	1.44675	0.804066	shanghai	2.75811	4.31286	0.757023	1	0	0	0	0	0	0	0	0	0	0	0	0	0	0	0	0	0	0
shanghai	2002	20.4256	7.88	11.3	93.2228	0.293314	23.7965	2.10588	3.14798	3.16954	2.4248	4.53499	-1.22651	1.14676	0.744735	shanghai	2.06433	3.01679	1.50433	0	1	0	0	0	0	0	0	0	0	0	0	0	0	0	0	0	0	0
shanghai	2003	6.91741	5.24	11.44	123.781	0.262674	27.9864	2.44636	3.29975	3.33172	2.43712	4.81851	-1.33684	1.19385	0.894601	shanghai	1.65632	1.93404	1.78715	0	0	1	0	0	0	0	0	0	0	0	0	0	0	0	0	0	0	0
shanghai	2004	110.379	16.83	13.34		0.296802	35.658	2.67302	4.73886	3.57397	2.59077		-1.21469	1.5558	0.983207	shanghai	2.82316	4.70392	1.47547	0	0	0	1	0	0	0	0	0	0	0	0	0	0	0	0	0	0	0
shanghai	2005	166.019	18.9	12.47	241.72	0.130572	33.7588	2.7072	2.00845	3.51924	2.52333	5.48778	-2.03583	0.697362	0.995916	shanghai	2.93916	5.1121	4.1446	0	0	0	0	1	0	0	0	0	0	0	0	0	0	0	0	0	0	0
shanghai	2006	13.0038	3.2	12.99	393.192	0.243832	43.9715	3.38503	4.84191	3.78354	2.56418	5.9743	-1.41128	1.57731	1.21936	shanghai	1.16315	2.56524	1.9917	0	0	0	0	0	1	0	0	0	0	0	0	0	0	0	0	0	0	0
shanghai	2007	162.318	31.08	12.88	438.446	0.244647	40.06	3.11025	4.44237	3.69038	2.55568	6.08324	-1.40794	1.49119	1.1347	shanghai	3.43656	5.08956	1.9823	0	0	0	0	0	0	1	0	0	0	0	0	0	0	0	0	0	0	0
shanghai	2008	37.4871	9.09	11.46	401.929	0.238842	38.5049	3.35994	4.1935	3.65079	2.43886	5.99628	-1.43195	1.43354	1.21192	shanghai	2.20717	3.624	2.05049	0	0	0	0	0	0	0	1	0	0	0	0	0	0	0	0	0	0	0
shanghai	2009	0.929902	0.09	10.69	349.648	0.952985	676.249	63.26	277.739	6.51656	2.36931	5.85693	-0.0481563	5.62668	4.14725	shanghai	-2.40795	-0.0726762	0.002319	0	0	0	0	0	0	0	0	1	0	0	0	0	0	0	0	0	0	0
shanghai	2010	5.47591	5.43	16.07	408.951	0.954225	698.897	43.4908	287.549	6.5495	2.77695	6.01359	-0.0468558	5.66139	3.77255	shanghai	1.69194	1.70036	0.0021955	0	0	0	0	0	0	0	0	0	1	0	0	0	0	0	0	0	0	0
shanghai	2011	54.4824	17.82	16.72	461.972	0.948697	668.139	39.9605	273.597	6.5045	2.81661	6.13551	-0.0526658	5.61166	3.68789	shanghai	2.88032	3.99788	0.0027737	0	0	0	0	0	0	0	0	0	0	1	0	0	0	0	0	0	0	0
shanghai	2012	-40.1901	9.08	9.22	452.371	0.952567	597.706	64.8271	245.878	6.3931	2.22138	6.1145	-0.0485953	5.50484	4.17172	shanghai	2.20607		0.0023615	0	0	0	0	0	0	0	0	0	0	0	1	0	0	0	0	0	0	0
shanghai	2013	31.0669	5.89	8.8	447.2	0.893393	684.803	77.8186	269.172	6.52913	2.17475	6.103	-0.112728	5.59535	4.35438	shanghai	1.77326	3.43614	0.0127077	0	0	0	0	0	0	0	0	0	0	0	0	1	0	0	0	0	0	0
shanghai	2014	15.6893	2.56	9.66	420.73	0.904919	730.488	75.6198	290.263	6.59371	2.26799	6.04199	-0.0999101	5.67079	4.32572	shanghai	0.940007	2.75298	0.009982	0	0	0	0	0	0	0	0	0	0	0	0	0	1	0	0	0	0	0
shanghai	2015	39.9057	7.48	4.56	363	0.884089	611.564	134.115	238.772	6.41602	1.51732	5.8944	-0.123198	5.47551	4.8987	shanghai	2.01223	3.68652	0.0151777	0	0	0	0	0	0	0	0	0	0	0	0	0	0	1	0	0	0	0
shanghai	2016	22.0932	3.98	4.97	376.63	0.884675	547.068	110.074	213.9	6.30457	1.60342	5.93126	-0.122535	5.36551	4.70115	shanghai	1.38128	3.09527	0.0150149	0	0	0	0	0	0	0	0	0	0	0	0	0	0	0	1	0	0	0
shanghai	2017	58.3069	9.79	3.4	439.14	0.855196	414.067	121.784	157.822	6.02603	1.22378	6.08482	-0.156425	5.06147	4.80225	shanghai	2.28136	4.06572	0.0244687	0	0	0	0	0	0	0	0	0	0	0	0	0	0	0	0	1	0	0
shanghai	2018	-16.5409	3.4	1.58	378.84	0.862037	425.277	269.163	163.215	6.05274	0.457425	5.93711	-0.148457	5.09507	5.59532	shanghai	1.22378		0.0220396	0	0	0	0	0	0	0	0	0	0	0	0	0	0	0	0	0	1	0
shanghai	2019	-0.76014	1.03	0.12	526.41	0.867394	445.228	3710.24	171.684	6.09859	-2.12026	6.26608	-0.142262	5.14566	8.21885	shanghai	0.0295588		0.0202383	0	0	0	0	0	0	0	0	0	0	0	0	0	0	0	0	0	0	1
yunnan	2000	7.95148	0.8395	67.07		0.723973	97.2759	1.45036	27.8948	4.57755	4.20574		-0.323001	3.32844	0.371815	yunnan	-0.174949	2.07336	0.10433	0	0	0	0	0	0	0	0	0	0	0	0	0	0	0	0	0	0	0
yunnan	2001	25.4535	10.84	74.8	121.835	0.655751	99.2009	1.32622	27.9306	4.59715	4.31482	4.80267	-0.421974	3.32972	0.282329	yunnan	2.38324	3.23685	0.178062	1	0	0	0	0	0	0	0	0	0	0	0	0	0	0	0	0	0	0
yunnan	2002	37.7122	7.6967	81.99	129.627	0.641665	111.332	1.35788	30.764	4.71252	4.4066	4.86466	-0.443689	3.42635	0.305922	yunnan	2.04079	3.62998	0.19686	0	1	0	0	0	0	0	0	0	0	0	0	0	0	0	0	0	0	0
yunnan	2003	4.5556	0.4987	87.54	160.739	0.706077	130.914	1.49548	39.0087	4.87454	4.4721	5.07978	-0.348031	3.66378	0.402444	yunnan	-0.695751	1.51636	0.121126	0	0	1	0	0	0	0	0	0	0	0	0	0	0	0	0	0	0	0
yunnan	2004	-8.01113	1.7203	104.87		0.744113	107.15	1.02174	31.019	4.67423	4.65272		-0.295562	3.4346	0.02151	yunnan	0.542499		0.0873569	0	0	0	1	0	0	0	0	0	0	0	0	0	0	0	0	0	0	0
yunnan	2005	26.9844	5.24	139.47	398.73	0.895706	319.111	2.28803	108.364	5.76554	4.93785	5.98829	-0.110143	4.6855	0.827691	yunnan	1.65632	3.29526	0.0121314	0	0	0	0	1	0	0	0	0	0	0	0	0	0	0	0	0	0	0
yunnan	2006	0.61698	1.2892	187.71	744.091	0.88464	315.998	1.68344	107.476	5.75574	5.2349	6.61216	-0.122575	4.67726	0.520839	yunnan	0.254022	-0.482918	0.0150245	0	0	0	0	0	1	0	0	0	0	0	0	0	0	0	0	0	0	0
yunnan	2007	-1.6249	1.2836	219.54	979.899	0.857249	260.102	1.18476	86.5503	5.56107	5.39153	6.88745	-0.154026	4.46073	0.16954	yunnan	0.249669		0.0237241	0	0	0	0	0	0	1	0	0	0	0	0	0	0	0	0	0	0	0
yunnan	2008	38.227	5.4745	206.64	881.277	0.844751	350.827	1.69777	114.806	5.86029	5.33098	6.78137	-0.168714	4.74324	0.529314	yunnan	1.7001	3.64354	0.0284643	0	0	0	0	0	0	0	1	0	0	0	0	0	0	0	0	0	0	0
yunnan	2009	131.956	21.1	209.14	680.843	0.828101	368.35	1.76126	118.844	5.90903	5.343	6.52333	-0.18862	4.77781	0.566029	yunnan	3.04927	4.88247	0.0355774	0	0	0	0	0	0	0	0	1	0	0	0	0	0	0	0	0	0	0
yunnan	2010	9.96556	4.9	237.33	1037.81	0.679863	390.878	1.64698	120.888	5.9684	5.46945	6.94487	-0.385864	4.79486	0.498944	yunnan	1.58923	2.29914	0.148891	0	0	0	0	0	0	0	0	0	1	0	0	0	0	0	0	0	0	0
yunnan	2011	60.667	14.26	267.49	1267.52	0.617176	345.709	1.29242	106.509	5.8456	5.58908	7.14482	-0.482601	4.66823	0.256516	yunnan	2.65746	4.1054	0.232904	0	0	0	0	0	0	0	0	0	0	1	0	0	0	0	0	0	0	0
yunnan	2012	21.2047	3.4069	286.46	1408.65	0.609128	364.469	1.27232	111.725	5.89844	5.6576	7.25039	-0.495727	4.71604	0.240842	yunnan	1.2258	3.05422	0.245746	0	0	0	0	0	0	0	0	0	0	0	1	0	0	0	0	0	0	0
yunnan	2013	20.1904	4.9913	300.42	1601.53	0.646771	364.595	1.21362	125.514	5.89879	5.70518	7.37871	-0.435764	4.83242	0.193604	yunnan	1.6077	3.00521	0.18989	0	0	0	0	0	0	0	0	0	0	0	0	1	0	0	0	0	0	0
yunnan	2014	90.1724	12.41	320.43	1891.54	0.600281	378.482	1.18117	131.794	5.93617	5.76966	7.54515	-0.510358	4.88124	0.166504	yunnan	2.5185	4.50172	0.260465	0	0	0	0	0	0	0	0	0	0	0	0	0	1	0	0	0	0	0
yunnan	2015	118.792	14.4824	332.83	1618.36	0.479659	297.503	0.893858	102.066	5.69542	5.80763	7.38917	-0.73468	4.62562	-0.112209	yunnan	2.67293	4.77737	0.539755	0	0	0	0	0	0	0	0	0	0	0	0	0	0	1	0	0	0	0
yunnan	2016	3.34866	1.263	355.48	1512.23	0.453344	293.155	0.824674	101.968	5.6807	5.87347	7.32134	-0.791104	4.62466	-0.192767	yunnan	0.23349	1.20856	0.625846	0	0	0	0	0	0	0	0	0	0	0	0	0	0	0	1	0	0	0
yunnan	2017	199.255	24.43	372.73		0.42829	309.617	0.830673	100.7	5.73534	5.92085		-0.847954	4.61214	-0.185519	yunnan	3.19581	5.29458	0.719026	0	0	0	0	0	0	0	0	0	0	0	0	0	0	0	0	1	0	0
yunnan	2018	27.2056	8.48	356.48		0.434526	373.98	1.04909	116.697	5.9242	5.87628		-0.833499	4.75958	0.0479237	yunnan	2.13771	3.30342	0.694721	0	0	0	0	0	0	0	0	0	0	0	0	0	0	0	0	0	1	0
yunnan	2019	-0.682297	0.0913	405.08	2315.51	0.398371	315.733	0.779435	100.448	5.7549	6.00408	7.74739	-0.92037	4.60964	-0.249186	yunnan	-2.3936		0.847082	0	0	0	0	0	0	0	0	0	0	0	0	0	0	0	0	0	0	1
neimenggu	2000	9.89798	6.69	18.98	34.8347	0.968132	479.864	25.2826	168.692	6.1735	2.94339	3.55061	-0.0323869	5.12807	3.23012	neimenggu	1.90061	2.29233	0.0010489	0	0	0	0	0	0	0	0	0	0	0	0	0	0	0	0	0	0	0
neimenggu	2001	86.1143	16.82	19.37	37.5777	0.971846	519.263	26.8076	182.818	6.25241	2.96373	3.62641	-0.0285579	5.20849	3.28869	neimenggu	2.82257	4.45568	0.0008156	1	0	0	0	0	0	0	0	0	0	0	0	0	0	0	0	0	0	0
neimenggu	2002	38.4559	9.64	20.97	42.2785	0.895063	30.4063	1.44999	10.9391	3.41465	3.04309	3.74428	-0.110862	2.39235	0.371558	neimenggu	2.26592	3.64951	0.0122903	0	1	0	0	0	0	0	0	0	0	0	0	0	0	0	0	0	0	0
neimenggu	2003	13.4114	1.95	33.53	70.5357	0.917093	38.975	1.16239	14.5034	3.66292	3.51244	4.25612	-0.0865461	2.67438	0.150481	neimenggu	0.667829	2.59611	0.0074902	0	0	1	0	0	0	0	0	0	0	0	0	0	0	0	0	0	0	0
neimenggu	2004	67.0417	13.24	55.68	129.957	0.434673	40.6873	0.730735	13.5948	3.70592	4.01962	4.8672	-0.833161	2.60969	-0.313704	neimenggu	2.58324	4.20531	0.694157	0	0	0	1	0	0	0	0	0	0	0	0	0	0	0	0	0	0	0
neimenggu	2005	142.149	15.71	70.53	169.115	0.436354	127.741	1.81116	29.8203	4.85001	4.25604	5.13058	-0.829301	3.39519	0.593967	neimenggu	2.7543	4.95687	0.68774	0	0	0	0	1	0	0	0	0	0	0	0	0	0	0	0	0	0	0
neimenggu	2006	26.7731	3.47	90.28	302.464	0.640604	267.048	2.95799	81.3478	5.58743	4.50292	5.71196	-0.445343	4.39873	1.08451	neimenggu	1.24415	3.2874	0.19833	0	0	0	0	0	1	0	0	0	0	0	0	0	0	0	0	0	0	0
neimenggu	2007	154.999	27.63	134.9	559.465	0.80101	186.324	1.3812	69.389	5.22749	4.90453	6.32698	-0.221882	4.23973	0.322953	neimenggu	3.3189	5.04342	0.0492315	0	0	0	0	0	0	1	0	0	0	0	0	0	0	0	0	0	0	0
neimenggu	2008	44.5175	8.97	166.86	832.135	0.767344	275.662	1.65205	98.9033	5.61918	5.11716	6.72399	-0.264819	4.59414	0.50202	neimenggu	2.19389	3.79588	0.0701294	0	0	0	0	0	0	0	1	0	0	0	0	0	0	0	0	0	0	0
neimenggu	2009	0.839507	0.11	181.23	960.804	0.822708	317.148	1.74998	116.886	5.75937	5.19977	6.86777	-0.195154	4.7612	0.559602	neimenggu	-2.20728	-0.17494	0.038085	0	0	0	0	0	0	0	0	1	0	0	0	0	0	0	0	0	0	0
neimenggu	2010	15.4695	5.46	224.5	1352.96	0.795663	288.339	1.28436	101.377	5.66413	5.41388	7.21005	-0.228579	4.61885	0.25026	neimenggu	1.69745	2.73887	0.0522484	0	0	0	0	0	0	0	0	0	1	0	0	0	0	0	0	0	0	0
neimenggu	2011	103.549	19.06	238.51	1706.08	0.777966	368.047	1.54311	127.263	5.90821	5.47441	7.44195	-0.251072	4.84626	0.4338	neimenggu	2.94759	4.64005	0.0630373	0	0	0	0	0	0	0	0	0	0	1	0	0	0	0	0	0	0	0
neimenggu	2012	32.923	9.34	243.88	1758.94	0.288517	56.238	0.230597	9.29565	4.02959	5.49668	7.47247	-1.243	2.22955	-1.46708	neimenggu	2.23431	3.49417	1.54505	0	0	0	0	0	0	0	0	0	0	0	1	0	0	0	0	0	0	0
neimenggu	2013	47.4943	5.02	286.98	2054.81	0.463484	91.4016	0.318495	21.4496	4.51526	5.65941	7.62794	-0.768984	3.06571	-1.14415	neimenggu	1.61343	3.86061	0.591337	0	0	0	0	0	0	0	0	0	0	0	0	1	0	0	0	0	0	0
neimenggu	2014	6.82827	3.78	329.89	1783.43	0.566654	65.3115	0.19798	18.5472	4.17917	5.79876	7.48629	-0.568006	2.92032	-1.61959	neimenggu	1.32972	1.92107	0.322631	0	0	0	0	0	0	0	0	0	0	0	0	0	1	0	0	0	0	0
neimenggu	2015	44.439	10.94	340.35	1834.34	0.894792	676.223	1.98685	261.712	6.51652	5.82998	7.51444	-0.111164	5.56725	0.686549	neimenggu	2.39243	3.79412	0.0123574	0	0	0	0	0	0	0	0	0	0	0	0	0	0	1	0	0	0	0
neimenggu	2016	11.6092	2.88	334.18	1938.31	0.898799	858.13	2.56787	334.565	6.75476	5.81168	7.56957	-0.106696	5.81283	0.943076	neimenggu	1.05779	2.4518	0.0113841	0	0	0	0	0	0	0	0	0	0	0	0	0	0	0	1	0	0	0
neimenggu	2017	37.5069	9.11	355		0.881134	613.273	1.72753	240.597	6.41881	5.87212		-0.126545	5.48312	0.546692	neimenggu	2.20937	3.62453	0.0160137	0	0	0	0	0	0	0	0	0	0	0	0	0	0	0	0	1	0	0
neimenggu	2018	16.9976	3.36	548.4	1475.84	0.883214	851.477	1.55266	335.283	6.74697	6.30701	7.29699	-0.124188	5.81497	0.439968	neimenggu	1.21194	2.83307	0.0154227	0	0	0	0	0	0	0	0	0	0	0	0	0	0	0	0	0	1	0
neimenggu	2019	1.59138	1.32	634.9	1790.7	0.882113	933.49	1.47029	366.928	6.83893	6.45347	7.49036	-0.125435	5.90517	0.385463	neimenggu	0.277632	0.464602	0.0157339	0	0	0	0	0	0	0	0	0	0	0	0	0	0	0	0	0	0	1
jilin	2000	6.2705	5.25	4.59	11.9813	0.759331	17.7918	3.87621	5.84425	2.87874	1.52388	2.48335	-0.275317	1.76546	1.35486	jilin	1.65823	1.83586	0.0757994	0	0	0	0	0	0	0	0	0	0	0	0	0	0	0	0	0	0	0
jilin	2001	37.1186	15.76	7.1	15.9978	0.763649	17.0441	2.40057	5.63669	2.8358	1.96009	2.77245	-0.269647	1.7293	0.875706	jilin	2.75747	3.61412	0.0727096	1	0	0	0	0	0	0	0	0	0	0	0	0	0	0	0	0	0	0
jilin	2002	32.8729	9.47	8.22	15.4621	0.74909	17.7249	2.15632	5.73998	2.87497	2.10657	2.73839	-0.288896	1.74746	0.768403	jilin	2.24813	3.49265	0.0834606	0	1	0	0	0	0	0	0	0	0	0	0	0	0	0	0	0	0	0
jilin	2003	26.0495	4.03	9.99	15.4896	0.814397	26.3702	2.63966	9.2116	3.27223	2.30158	2.74017	-0.205307	2.22046	0.970649	jilin	1.39377	3.26	0.0421511	0	0	1	0	0	0	0	0	0	0	0	0	0	0	0	0	0	0	0
jilin	2004	-1.81976	4.15	7.27	45.5525	0.678756	23.1779	3.18816	6.88461	3.1432	1.98376	3.81887	-0.387494	1.92929	1.15944	jilin	1.42311		0.150151	0	0	0	1	0	0	0	0	0	0	0	0	0	0	0	0	0	0	0
jilin	2005	27.9974	11.53	0.72	26.3865	0.738751	17.2129	23.9068	5.6947	2.84566	-0.328504	3.27285	-0.302794	1.73954	3.17416	jilin	2.44495	3.33211	0.0916843	0	0	0	0	1	0	0	0	0	0	0	0	0	0	0	0	0	0	0
jilin	2006	6.16536	3.39	0.89	42.1984	0.768167	27.7608	31.1919	9.47975	3.32363	-0.116534	3.74238	-0.263748	2.24916	3.44016	jilin	1.22083	1.81895	0.0695633	0	0	0	0	0	1	0	0	0	0	0	0	0	0	0	0	0	0	0
jilin	2007	24.5287	8.71	1.57	73.2167	0.71375	32.0348	20.4043	10.2196	3.46682	0.451076	4.29342	-0.337223	2.32431	3.01575	jilin	2.16447	3.19984	0.113719	0	0	0	0	0	0	1	0	0	0	0	0	0	0	0	0	0	0	0
jilin	2008	8.18473	2.61	0.27	95.1431	0.81281	36.856	136.504	13.0846	3.60702	-1.30933	4.55538	-0.207258	2.57143	4.91635	jilin	0.95935	2.10227	0.0429558	0	0	0	0	0	0	0	1	0	0	0	0	0	0	0	0	0	0	0
jilin	2009	2.43298	2.17	0.32	114.296	0.741126	43.8077	136.899	14.2695	3.77981	-1.13943	4.73879	-0.299585	2.65812	4.91924	jilin	0.774727	0.889119	0.0897511	0	0	0	0	0	0	0	0	1	0	0	0	0	0	0	0	0	0	0
jilin	2010	4.63351	3	0.57	121.41	0.799029	37.6045	65.9728	12.977	3.62712	-0.562119	4.79917	-0.224358	2.56318	4.18924	jilin	1.09861	1.53331	0.0503363	0	0	0	0	0	0	0	0	0	1	0	0	0	0	0	0	0	0	0
jilin	2011	25.8783	13.49	1.74	190.626	0.920847	132.815	76.3304	53.0166	4.88896	0.553885	5.25032	-0.0824609	3.9706	4.33507	jilin	2.60195	3.2534	0.0067998	0	0	0	0	0	0	0	0	0	0	1	0	0	0	0	0	0	0	0
jilin	2012	50.1246	9.24	3.55	235.544	0.963764	146.595	41.2943	60.9668	4.98767	1.26695	5.4619	-0.0369089	4.11033	3.72072	jilin	2.22354	3.91451	0.0013623	0	0	0	0	0	0	0	0	0	0	0	1	0	0	0	0	0	0	0
jilin	2013	0.804108	0.77	0.85	273.732	0.856728	79.4058	93.4186	29.8171	4.37457	-0.162519	5.61215	-0.154635	3.39508	4.53709	jilin	-0.261365	-0.218021	0.023912	0	0	0	0	0	0	0	0	0	0	0	0	1	0	0	0	0	0	0
jilin	2014	8.50367	3.2	0.59	287.61	0.841871	107.835	182.77	38.8398	4.6806	-0.527633	5.66161	-0.172128	3.65944	5.20823	jilin	1.16315	2.1405	0.0296282	0	0	0	0	0	0	0	0	0	0	0	0	0	1	0	0	0	0	0
jilin	2015	14.6274	7.55	0.16	290.55	0.878176	82.5364	515.853	30.5246	4.41324	-1.83258	5.67178	-0.129909	3.41853	6.24582	jilin	2.02155	2.6829	0.0168763	0	0	0	0	0	0	0	0	0	0	0	0	0	0	1	0	0	0	0
jilin	2016	2.30687	0.99	0.16	301.378	0.772062	41.958	262.237	13.1319	3.73667	-1.83258	5.70837	-0.25869	2.57505	5.56925	jilin	-0.0100503	0.835891	0.0669207	0	0	0	0	0	0	0	0	0	0	0	0	0	0	0	1	0	0	0
jilin	2017	2.79461	2.4	12.55	208.375	0.875733	68.2609	5.43911	25.3026	4.22334	2.52972	5.33934	-0.132694	3.23091	1.69362	jilin	0.875469	1.02769	0.0176076	0	0	0	0	0	0	0	0	0	0	0	0	0	0	0	0	1	0	0
jilin	2018	23.8454	5.99	12.6	123.467	0.873481	60.3549	4.79008	21.7608	4.10024	2.5337	4.81597	-0.135269	3.08011	1.56655	jilin	1.79009	3.17159	0.0182976	0	0	0	0	0	0	0	0	0	0	0	0	0	0	0	0	0	1	0
jilin	2019	115.33	19.69	13.07	131.05	0.693735	36.2025	2.76989	11.3113	3.58913	2.57032	4.87558	-0.365665	2.4258	1.01881	jilin	2.98011	4.7478	0.133711	0	0	0	0	0	0	0	0	0	0	0	0	0	0	0	0	0	0	1
sichuan	2000	8.77335	1.88	16.73		0.365954	58.8046	3.51492	10.5257	4.07422	2.8172		-1.00525	2.35382	1.25702	sichuan	0.631272	2.17172	1.01052	0	0	0	0	0	0	0	0	0	0	0	0	0	0	0	0	0	0	0
sichuan	2001	4.59008	12.05	21.53	49.68	0.347735	61.0775	2.83686	10.445	4.11214	3.06945	3.9056	-1.05632	2.34612	1.0427	sichuan	2.48907	1.5239	1.1158	1	0	0	0	0	0	0	0	0	0	0	0	0	0	0	0	0	0	0
sichuan	2002	66.9642	10.97	36.69	64.15	0.359129	68.3441	1.86274	11.9488	4.22455	3.6025	4.16122	-1.02407	2.48063	0.622051	sichuan	2.39516	4.20416	1.04872	0	1	0	0	0	0	0	0	0	0	0	0	0	0	0	0	0	0	0
sichuan	2003	1.84668	0.52	45.36	90.73	0.407854	78.5108	1.73084	15.7296	4.36324	3.81463	4.50789	-0.896847	2.75554	0.548605	sichuan	-0.653926	0.613387	0.804335	0	0	1	0	0	0	0	0	0	0	0	0	0	0	0	0	0	0	0
sichuan	2004	-2.13969	2.57	52.92		0.436752	88.5693	1.67364	18.5143	4.48379	3.96878		-0.82839	2.91854	0.515004	sichuan	0.943906		0.68623	0	0	0	1	0	0	0	0	0	0	0	0	0	0	0	0	0	0	0
sichuan	2005	32.1676	6.24	60.68	168.2	0.387927	89.9025	1.48158	17.5823	4.49873	4.10561	5.12515	-0.946938	2.86689	0.393111	sichuan	1.83098	3.47096	0.896691	0	0	0	0	1	0	0	0	0	0	0	0	0	0	0	0	0	0	0
sichuan	2006	44.7014	2	64.71	307.96	0.390653	97.2695	1.50316	19.2523	4.57749	4.16992	5.72997	-0.939935	2.95763	0.40757	sichuan	0.693147	3.8	0.883478	0	0	0	0	0	1	0	0	0	0	0	0	0	0	0	0	0	0	0
sichuan	2007	5.91462	2.94	72.3	449.18	0.373247	115.682	1.60003	22.3152	4.75084	4.28082	6.10742	-0.985514	3.10527	0.470019	sichuan	1.07841	1.77743	0.971237	0	0	0	0	0	0	1	0	0	0	0	0	0	0	0	0	0	0	0
sichuan	2008	24.6364	6.92	66.57	469.61	0.413933	128.946	1.93701	27.6588	4.8594	4.19825	6.1519	-0.882052	3.31994	0.661143	sichuan	1.93442	3.20423	0.778016	0	0	0	0	0	0	0	1	0	0	0	0	0	0	0	0	0	0	0
sichuan	2009	301.506	22.99	70.66	483.58	0.467646	153.471	2.17197	34.6693	5.03351	4.25788	6.18122	-0.760043	3.54585	0.775633	sichuan	3.13506	5.70879	0.577666	0	0	0	0	0	0	0	0	1	0	0	0	0	0	0	0	0	0	0
sichuan	2010	12.9327	5.5	91.58	646.95	0.382109	277.966	3.03522	51.158	5.6275	4.51721	6.47227	-0.962048	3.93492	1.11028	sichuan	1.70475	2.55976	0.925537	0	0	0	0	0	0	0	0	0	1	0	0	0	0	0	0	0	0	0
sichuan	2011	87.696	15.74	98.71	936.34	0.335869	265.207	2.68672	48.4045	5.58051	4.59219	6.84198	-1.09103	3.87959	0.988323	sichuan	2.75621	4.47388	1.19035	0	0	0	0	0	0	0	0	0	0	1	0	0	0	0	0	0	0	0
sichuan	2012	25.2292	7.09	81.34	925.81	0.397317	282.916	3.47819	55.81	5.64515	4.39864	6.83067	-0.92302	4.02195	1.24651	sichuan	1.95869	3.228	0.851965	0	0	0	0	0	0	0	0	0	0	0	1	0	0	0	0	0	0	0
sichuan	2013	68.7867	5.17	81.31	954.09	0.362797	338.528	4.16342	67.148	5.82461	4.39827	6.86076	-1.01391	4.2069	1.42634	sichuan	1.64287	4.23101	1.02802	0	0	0	0	0	0	0	0	0	0	0	0	1	0	0	0	0	0	0
sichuan	2014	119.835	16.54	68.26	898.63	0.360991	330.989	4.84894	67.5371	5.80208	4.22332	6.80087	-1.0189	4.21268	1.57876	sichuan	2.80578	4.78611	1.03816	0	0	0	0	0	0	0	0	0	0	0	0	0	1	0	0	0	0	0
sichuan	2015	193.581	16.12	59.34	778.14	0.35167	389.926	6.57106	75.4832	5.96596	4.08328	6.65691	-1.04506	4.32391	1.88268	sichuan	2.78006	5.2657	1.09215	0	0	0	0	0	0	0	0	0	0	0	0	0	0	1	0	0	0	0
sichuan	2016	14.2468	3.24	54.95	841.92	0.394286	369.837	6.73042	79.8181	5.91306	4.00642	6.73569	-0.93068	4.37975	1.90664	sichuan	1.17557	2.65653	0.866165	0	0	0	0	0	0	0	0	0	0	0	0	0	0	0	1	0	0	0
sichuan	2017	194.626	29.98	67.82	755.73	0.383681	355.868	5.24724	75.5551	5.87456	4.21686	6.62768	-0.957944	4.32486	1.6577	sichuan	3.40053	5.27108	0.917656	0	0	0	0	0	0	0	0	0	0	0	0	0	0	0	0	1	0	0
sichuan	2018	53.6144	8.84	79.8	859.22	0.303722	260.306	3.26198	39.5204	5.56186	4.37952	6.75603	-1.19164	3.67682	1.18233	sichuan	2.17929	3.98182	1.42001	0	0	0	0	0	0	0	0	0	0	0	0	0	0	0	0	0	1	0
sichuan	2019	1.14366	0.09	97	900.55	0.266	250.781	2.58538	34.476	5.52458	4.57471	6.80301	-1.32426	3.54026	0.949871	sichuan	-2.40795	0.134234	1.75366	0	0	0	0	0	0	0	0	0	0	0	0	0	0	0	0	0	0	1
tianjin	2000	10.0815	5.05	3.18		0.93485	40.3659	12.6937	15.8455	3.69799	1.15688		-0.0673691	2.76289	2.5411	tianjin	1.61939	2.3107	0.0045386	0	0	0	0	0	0	0	0	0	0	0	0	0	0	0	0	0	0	0
tianjin	2001	65.1143	16.84	2.99	37.2804	0.936963	32.8912	11.0004	13.2131	3.49321	1.09527	3.61847	-0.0651118	2.58121	2.39793	tianjin	2.82376	4.17614	0.0042395	1	0	0	0	0	0	0	0	0	0	0	0	0	0	0	0	0	0	0
tianjin	2002	-3.96416	8.55	3.46	46.9957	0.912501	27.6246	7.984	10.0009	3.31871	1.24127	3.85006	-0.0915666	2.30267	2.07744	tianjin	2.14593		0.0083844	0	1	0	0	0	0	0	0	0	0	0	0	0	0	0	0	0	0	0
tianjin	2003	26.6006	5.69	3.49	47.6031	0.915121	13.8843	3.9783	5.40178	2.63076	1.2499	3.8629	-0.0886989	1.68673	1.38085	tianjin	1.73871	3.28093	0.0078675	0	0	1	0	0	0	0	0	0	0	0	0	0	0	0	0	0	0	0
tianjin	2004	13.714	2.51	3.13		0.743207	18.7039	5.9757	6.04709	2.92873	1.14103		-0.296781	1.79958	1.7877	tianjin	0.920283	2.61842	0.088079	0	0	0	1	0	0	0	0	0	0	0	0	0	0	0	0	0	0	0
tianjin	2005	30.7386	5.94	2.97	96.26	0.760301	13.0992	4.41049	4.40683	2.57255	1.08856	4.56705	-0.274041	1.48316	1.48399	tianjin	1.78171	3.42552	0.0750984	0	0	0	0	1	0	0	0	0	0	0	0	0	0	0	0	0	0	0
tianjin	2006	34.56	4.21	3.32	151.468	0.592648	14.9573	4.5052	4.09359	2.7052	1.19996	5.02037	-0.523154	1.40942	1.50523	tianjin	1.43746	3.5427	0.27369	0	0	0	0	0	1	0	0	0	0	0	0	0	0	0	0	0	0	0
tianjin	2007	72.681	9.1	3.03	189.434	0.719521	13.8494	4.57076	4.55465	2.62824	1.10856	5.24404	-0.32917	1.51615	1.51968	tianjin	2.20827	4.28608	0.108353	0	0	0	0	0	0	1	0	0	0	0	0	0	0	0	0	0	0	0
tianjin	2008	4.60751	3.34	3.23	253.129	0.715151	18.62	5.76472	6.04129	2.92424	1.17248	5.5339	-0.335262	1.79862	1.75176	tianjin	1.20597	1.52769	0.112401	0	0	0	0	0	0	0	1	0	0	0	0	0	0	0	0	0	0	0
tianjin	2009	-1.28223	0.89	3.21	219.696	0.744608	19.9873	6.22657	6.81219	2.9951	1.16627	5.39224	-0.294897	1.91871	1.82883	tianjin	-0.116534		0.0869643	0	0	0	0	0	0	0	0	1	0	0	0	0	0	0	0	0	0	0
tianjin	2010	8.49968	1.62	2.66	447.179	0.624102	21.2837	8.00138	5.83924	3.05794	0.978326	6.10296	-0.471442	1.7646	2.07961	tianjin	0.482426	2.14003	0.222257	0	0	0	0	0	0	0	0	0	1	0	0	0	0	0	0	0	0	0
tianjin	2011	28.7507	11.77	2.22	580.6	0.573927	30.7441	13.8487	7.87637	3.4257	0.797507	6.36406	-0.555253	2.06387	2.62819	tianjin	2.46555	3.35866	0.308305	0	0	0	0	0	0	0	0	0	0	1	0	0	0	0	0	0	0	0
tianjin	2012	48.7097	5.6152	1.02	671.498	0.536641	54.6033	53.5327	13.3866	4.00009	0.0198026	6.50951	-0.622425	2.59425	3.98029	tianjin	1.72548	3.88588	0.387413	0	0	0	0	0	0	0	0	0	0	0	1	0	0	0	0	0	0	0
tianjin	2013	2.36375	0.5225	0.6	874.998	0.485138	62.3073	103.845	14.0412	4.13208	-0.510826	6.77422	-0.723322	2.64199	4.6429	tianjin	-0.64913	0.860249	0.523195	0	0	0	0	0	0	0	0	0	0	0	0	1	0	0	0	0	0	0
tianjin	2014	-8.95566	2.1426	7.5	1054.89	0.46783	46.9279	6.25706	10.5603	3.84861	2.0149	6.96119	-0.759651	2.3571	1.83371	tianjin	0.76202		0.57707	0	0	0	0	0	0	0	0	0	0	0	0	0	1	0	0	0	0	0
tianjin	2015	37.6714	5.47	4	876.12	0.239032	58.1616	14.5404	7.58512	4.06323	1.38629	6.7755	-1.43116	2.02619	2.67693	tianjin	1.69928	3.6289	2.04821	0	0	0	0	0	0	0	0	0	0	0	0	0	0	1	0	0	0	0
tianjin	2016	1.54981	1.2061	3.36	861.21	0.278708	54.8611	16.3277	7.57472	4.0048	1.21194	6.75834	-1.27759	2.02482	2.79286	tianjin	0.187392	0.438132	1.63224	0	0	0	0	0	0	0	0	0	0	0	0	0	0	0	1	0	0	0
tianjin	2017	-2.01078	1.5273	1.91		0.254613	34.7816	18.2103	4.17496	3.54909	0.647103		-1.36801	1.42911	2.90199	tianjin	0.423501		1.87145	0	0	0	0	0	0	0	0	0	0	0	0	0	0	0	0	1	0	0
tianjin	2018	23.2998	6.3637	1.69		0.152001	41.4473	24.525	3.21125	3.72442	0.524729		-1.88387	1.16666	3.19969	tianjin	1.85061	3.14845	3.54895	0	0	0	0	0	0	0	0	0	0	0	0	0	0	0	0	0	1	0
tianjin	2019	206.213	22.2085	1.42	677.35	0.133211	50.2004	35.3524	5.14899	3.91602	0.350657	6.51819	-2.01582	1.6388	3.56536	tianjin	3.10047	5.32891	4.06353	0	0	0	0	0	0	0	0	0	0	0	0	0	0	0	0	0	0	1
ningxia	2000	4.10729	2.53	15.39	25.8311						2.73372	3.25158				ningxia	0.928219	1.41276		0	0	0	0	0	0	0	0	0	0	0	0	0	0	0	0	0	0	0
ningxia	2001	27.1861	16.38	17.74	25.9636						2.87582	3.2567				ningxia	2.79606	3.30271		1	0	0	0	0	0	0	0	0	0	0	0	0	0	0	0	0	0	0
ningxia	2002	103.691	11.08	29.77	32.8291						3.3935	3.49132				ningxia	2.40514	4.64142		0	1	0	0	0	0	0	0	0	0	0	0	0	0	0	0	0	0	0
ningxia	2003	3.76012	0.6353	32.72	40.6183	0.580396	61.842	1.89004	26.0703	4.12458	3.48799	3.70422	-0.544045	3.26079	0.636597	ningxia	-0.453658	1.32445	0.295985	0	0	1	0	0	0	0	0	0	0	0	0	0	0	0	0	0	0	0
ningxia	2004	11.9759	2.8627	35.98	58.1218	0.769922	25.4822	0.708233	10.5633	3.23798	3.58296	4.06254	-0.261467	2.35739	-0.344983	ningxia	1.05177	2.48289	0.0683648	0	0	0	1	0	0	0	0	0	0	0	0	0	0	0	0	0	0	0
ningxia	2005	31.0339	8.94	44.67	56.6	0.176744	32.2601	0.722188	7.98329	3.47383	3.7993	4.03601	-1.73305	2.07735	-0.32547	ningxia	2.19054	3.43508	3.00347	0	0	0	0	1	0	0	0	0	0	0	0	0	0	0	0	0	0	0
ningxia	2006	23.8639	1.524	67.25	109.422	0.165806	54.4046	0.80899	11.6124	3.99645	4.20842	4.69521	-1.79694	2.45207	-0.211968	ningxia	0.421339	3.17237	3.22898	0	0	0	0	0	1	0	0	0	0	0	0	0	0	0	0	0	0	0
ningxia	2007	2.07234	2.7043	73.01	131.612	0.113771	43.5799	0.596903	7.82775	3.7746	4.2906	4.87986	-2.17356	2.05768	-0.516	ningxia	0.994843	0.728677	4.72438	0	0	0	0	0	0	1	0	0	0	0	0	0	0	0	0	0	0	0
ningxia	2008	21.8989	6.6993	72.56	149.493	0.16432	80.8847	1.11473	12.9464	4.39302	4.28441	5.00725	-1.80594	2.56082	0.108611	ningxia	1.902	3.08644	3.26142	0	0	0	0	0	0	0	1	0	0	0	0	0	0	0	0	0	0	0
ningxia	2009	212.545	20.809	76.2	131.692	0.276435	96.6065	1.2678	22.828	4.57065	4.33336	4.88047	-1.28578	3.12799	0.237284	ningxia	3.03539	5.35916	1.65323	0	0	0	0	0	0	0	0	1	0	0	0	0	0	0	0	0	0	0
ningxia	2010	-3.76587	6.8645	102.27	218.813	0.081297	76.392	0.746964	6.83763	4.33588	4.62762	5.38822	-2.50965	1.92244	-0.291738	ningxia	1.92636		6.29833	0	0	0	0	0	0	0	0	0	1	0	0	0	0	0	0	0	0	0
ningxia	2011	60.6207	17.54	130.1	235.396	0.070284	48.4565	0.372455	5.44767	3.88067	4.8683	5.46127	-2.65521	1.69519	-0.987638	ningxia	2.86448	4.10464	7.05015	0	0	0	0	0	0	0	0	0	0	1	0	0	0	0	0	0	0	0
ningxia	2012	22.0883	9.5037	164.32	345.339	0.047582	31.9992	0.194737	3.35926	3.46571	5.10182	5.84452	-3.04529	1.21172	-1.6361	ningxia	2.25168	3.09505	9.27381	0	0	0	0	0	0	0	0	0	0	0	1	0	0	0	0	0	0	0
ningxia	2013	15.4826	2.6631	164.04	379.225	0.069037	30.2653	0.184499	4.10744	3.41	5.10011	5.93813	-2.67312	1.4128	-1.69011	ningxia	0.979491	2.73971	7.14555	0	0	0	0	0	0	0	0	0	0	0	0	1	0	0	0	0	0	0
ningxia	2014	81.5717	14.09	151.01	351.182	0.309913	57.095	0.378088	13.9231	4.04472	5.01735	5.8613	-1.17146	2.63355	-0.972629	ningxia	2.64547	4.40148	1.37233	0	0	0	0	0	0	0	0	0	0	0	0	0	1	0	0	0	0	0
ningxia	2015	168.011	16.7753	140.71	305.207	0.191882	46.6574	0.331585	8.49147	3.84283	4.9467	5.72099	-1.65087	2.13906	-1.10387	ningxia	2.81991	5.12403	2.72538	0	0	0	0	0	0	0	0	0	0	0	0	0	0	1	0	0	0	0
ningxia	2016	17.4338	3.635	122.54	281.334	0.160384	31.5388	0.257376	7.03511	3.45122	4.80844	5.63954	-1.83018	1.95091	-1.35722	ningxia	1.29061	2.85841	3.34957	0	0	0	0	0	0	0	0	0	0	0	0	0	0	0	1	0	0	0
ningxia	2017	133.366	27.13	132.82	260.888	0.273941	33.0777	0.249041	9.53184	3.49886	4.889	5.56409	-1.29484	2.25464	-1.39014	ningxia	3.30064	4.89309	1.67662	0	0	0	0	0	0	0	0	0	0	0	0	0	0	0	0	1	0	0
ningxia	2018	39.2642	9.17	134.97	283.639	0.127701	26.1971	0.194095	6.93751	3.26565	4.90505	5.6477	-2.05806	1.93694	-1.63941	ningxia	2.21594	3.67031	4.23561	0	0	0	0	0	0	0	0	0	0	0	0	0	0	0	0	0	1	0
ningxia	2019	0.990312	0.0878	133.39	256.78	0.043009	18.9453	0.14203	3.29318	2.94156	4.89328	5.54822	-3.14635	1.19185	-1.95172	ningxia	-2.43269	-0.0097349	9.89954	0	0	0	0	0	0	0	0	0	0	0	0	0	0	0	0	0	0	1
anhui	2000	-0.69	2.43	26.18	61.27	0.546616	87.8988	3.35748	18.9712	4.47619	3.265	4.11529	-0.604009	2.94292	1.21119	anhui	0.887891		0.364827	0	0	0	0	0	0	0	0	0	0	0	0	0	0	0	0	0	0	0
anhui	2001	3.68	10.8	27.89	88.3	0.551824	88.98	3.19039	19.357	4.48841	3.32827	4.48074	-0.594526	2.96306	1.16014	anhui	2.37955	1.30291	0.353461	1	0	0	0	0	0	0	0	0	0	0	0	0	0	0	0	0	0	0
anhui	2002	2.44	4.25	31.92	101.54	0.559719	90.0202	2.82018	19.8353	4.50003	3.46323	4.62045	-0.58032	2.98746	1.0368	anhui	1.44692	0.891998	0.336772	0	1	0	0	0	0	0	0	0	0	0	0	0	0	0	0	0	0	0
anhui	2003	1.08	0.57	40.88	125	0.541117	98.6457	2.41305	21.0686	4.59154	3.71064	4.82831	-0.614119	3.04778	0.880893	anhui	-0.562119	0.0769611	0.377143	0	0	1	0	0	0	0	0	0	0	0	0	0	0	0	0	0	0	0
anhui	2004	0.13	2.85	42.93	221.38	0.612785	31.9334	0.743847	7.55074	3.46365	3.75957	5.39988	-0.489742	2.02164	-0.29592	anhui	1.04732	-2.04022	0.239847	0	0	0	1	0	0	0	0	0	0	0	0	0	0	0	0	0	0	0
anhui	2005	0.82	4.98	56.34	316.32	0.709946	106.662	1.89318	28.3404	4.66967	4.03141	5.75675	-0.342567	3.34429	0.63826	anhui	1.60543	-0.198451	0.117352	0	0	0	0	1	0	0	0	0	0	0	0	0	0	0	0	0	0	0
anhui	2006	1.85	1.07	77.1	561.12	0.420904	52.8977	0.686092	9.70926	3.96836	4.3451	6.32993	-0.86535	2.27308	-0.376744	anhui	0.0676587	0.615186	0.748831	0	0	0	0	0	1	0	0	0	0	0	0	0	0	0	0	0	0	0
anhui	2007	2.48	1.1	79.65	711.73	0.423012	52.4498	0.658504	9.72577	3.95986	4.37764	6.5677	-0.860354	2.27478	-0.417785	anhui	0.0953102	0.908259	0.740209	0	0	0	0	0	0	1	0	0	0	0	0	0	0	0	0	0	0	0
anhui	2008	0.64	4.58	93.73	750.13	0.393127	48.5629	0.518115	8.47948	3.88286	4.54042	6.62025	-0.933623	2.13765	-0.657558	anhui	1.5217	-0.446287	0.871652	0	0	0	0	0	0	0	1	0	0	0	0	0	0	0	0	0	0	0
anhui	2009	17.24	10.87	132.68	821.64	0.310416	52.6057	0.396486	7.47745	3.96283	4.88794	6.7113	-1.16984	2.01189	-0.925115	anhui	2.38601	2.84723	1.36853	0	0	0	0	0	0	0	0	1	0	0	0	0	0	0	0	0	0	0
anhui	2010	1.54	7.33	168.96	1151.38	0.379695	77.1772	0.456778	13.11	4.3461	5.12966	7.04872	-0.968387	2.57338	-0.783558	anhui	1.99198	0.431782	0.937773	0	0	0	0	0	0	0	0	0	1	0	0	0	0	0	0	0	0	0
anhui	2011	4.75	6.65	142.36	1643.98	0.282029	61.3691	0.431084	8.26778	4.11691	4.95836	7.40487	-1.26574	2.11237	-0.841453	anhui	1.89462	1.55814	1.60211	0	0	0	0	0	0	0	0	0	0	1	0	0	0	0	0	0	0	0
anhui	2012	9.93	8.05	140.5	1833.18	0.291112	72.2255	0.514061	10.1989	4.27979	4.94521	7.51381	-1.23405	2.32228	-0.665414	anhui	2.08567	2.29556	1.52287	0	0	0	0	0	0	0	0	0	0	0	1	0	0	0	0	0	0	0
anhui	2013	0.56	1.19	128.76	2128.82	0.192837	80.2381	0.62316	8.16407	4.385	4.85795	7.66332	-1.64591	2.09974	-0.472952	anhui	0.173953	-0.579819	2.70902	0	0	0	0	0	0	0	0	0	0	0	0	1	0	0	0	0	0	0
anhui	2014	4.52	5.49	137.51	2455.2	0.190877	81.5909	0.593345	8.19038	4.40172	4.9237	7.80596	-1.65613	2.10296	-0.521979	anhui	1.70293	1.50851	2.74276	0	0	0	0	0	0	0	0	0	0	0	0	0	1	0	0	0	0	0
anhui	2015	0.56	7.32	139.27	2598.79	0.218339	73.8577	0.53032	8.74266	4.30214	4.93642	7.8628	-1.52171	2.16822	-0.634274	anhui	1.99061	-0.579819	2.31559	0	0	0	0	0	0	0	0	0	0	0	0	0	0	1	0	0	0	0
anhui	2016	0.29	3.89	218.53	2734.53	0.293511	105.485	0.482703	16.2924	4.65857	5.38692	7.91371	-1.22584	2.7907	-0.728354	anhui	1.35841	-1.23787	1.50269	0	0	0	0	0	0	0	0	0	0	0	0	0	0	0	1	0	0	0
anhui	2017	17.41	13.71	221	2951.21	0.36404	68.1664	0.308445	13.1435	4.22195	5.39816	7.98997	-1.01049	2.57593	-1.17621	anhui	2.61813	2.85704	1.0211	0	0	0	0	0	0	0	0	0	0	0	0	0	0	0	0	1	0	0
anhui	2018	4.82	3.8	209.6	3120.42	0.174114	84.8665	0.404897	8.31844	4.44108	5.3452	8.04572	-1.74805	2.11847	-0.904122	anhui	1.335	1.57277	3.05567	0	0	0	0	0	0	0	0	0	0	0	0	0	0	0	0	0	1	0
anhui	2019	0.13	0.13	202.2	2996.19	0.1842	68.0043	0.336322	7.11156	4.21957	5.30926	8.0051	-1.69173	1.96172	-1.08969	anhui	-2.04022	-2.04022	2.86197	0	0	0	0	0	0	0	0	0	0	0	0	0	0	0	0	0	0	1
shandon	2000	0.223342	6.36	13.13		0.701128	161.783	12.3217	50.1552	5.08626	2.5749		-0.355065	3.91512	2.51136	shandon	1.85003	-1.49905	0.126071	0	0	0	0	0	0	0	0	0	0	0	0	0	0	0	0	0	0	0
shandon	2001	62.5962	17.19	23.6	161.491	0.751924	182.925	7.75104	60.5085	5.20907	3.16125	5.08445	-0.28512	4.10278	2.04783	shandon	2.84433	4.1367	0.0812936	1	0	0	0	0	0	0	0	0	0	0	0	0	0	0	0	0	0	0
shandon	2002	21.2135	9.16	26.63	175.165	0.770535	200.9	7.54414	68.3016	5.30281	3.28204	5.16573	-0.260671	4.22393	2.02077	shandon	2.21485	3.05464	0.0679491	0	1	0	0	0	0	0	0	0	0	0	0	0	0	0	0	0	0	0
shandon	2003	19.1413	4.17	31.81	293.877	0.532587	402.414	12.6506	103.566	5.99748	3.45978	5.68316	-0.63001	4.64021	2.5377	shandon	1.42792	2.95185	0.396912	0	0	1	0	0	0	0	0	0	0	0	0	0	0	0	0	0	0	0
shandon	2004	77.932	14.76	61.97		0.642126	386.987	6.24474	114.915	5.95839	4.12665		-0.44297	4.74419	1.83174	shandon	2.69192	4.35584	0.196222	0	0	0	1	0	0	0	0	0	0	0	0	0	0	0	0	0	0	0
shandon	2005	164.316	17.76	79.77	728.57	0.807324	562.251	7.0484	202.856	6.33195	4.37915	6.59108	-0.21403	5.3125	1.9528	shandon	2.87695	5.10179	0.0458089	0	0	0	0	1	0	0	0	0	0	0	0	0	0	0	0	0	0	0
shandon	2006	21.3869	3.8	119.43	1067.88	0.58336	781.29	6.54182	219.163	6.66095	4.78273	6.97343	-0.53895	5.38982	1.87822	shandon	1.335	3.06278	0.290468	0	0	0	0	0	1	0	0	0	0	0	0	0	0	0	0	0	0	0
shandon	2007	134.985	28.5	158.15	1687.89	0.87733	577.938	3.65437	220.399	6.35947	5.06354	7.43123	-0.130872	5.39544	1.29592	shandon	3.3499	4.90517	0.0171275	0	0	0	0	0	0	1	0	0	0	0	0	0	0	0	0	0	0	0
shandon	2008	42.0624	9.54	187.06	2081.97	0.854792	654.28	3.4977	245.458	6.48354	5.23143	7.64107	-0.156897	5.50312	1.25211	shandon	2.25549	3.73915	0.0246167	0	0	0	0	0	0	0	1	0	0	0	0	0	0	0	0	0	0	0
shandon	2009	0.421111	0.08	203.64	2403.25	0.611532	838.703	4.11856	243.432	6.73186	5.31635	7.78458	-0.491788	5.49484	1.4155	shandon	-2.52573	-0.864858	0.241856	0	0	0	0	0	0	0	0	1	0	0	0	0	0	0	0	0	0	0
shandon	2010	16.6206	6.14	218.76	2994.42	0.45282	1073.29	4.90623	243.978	6.97848	5.38797	8.0045	-0.79226	5.49708	1.59051	shandon	1.81482	2.81064	0.627675	0	0	0	0	0	0	0	0	0	1	0	0	0	0	0	0	0	0	0
shandon	2011	82.4308	19.36	263.26	4121.01	0.688358	797.594	3.02968	253.993	6.6816	5.57314	8.32385	-0.373446	5.5373	1.10846	shandon	2.96321	4.41196	0.139462	0	0	0	0	0	0	0	0	0	0	1	0	0	0	0	0	0	0	0
shandon	2012	7.366	9.7	281.07	5237.23	0.684691	882.093	3.13834	279.908	6.7823	5.6386	8.56355	-0.378787	5.63446	1.14369	shandon	2.27213	1.99687	0.14348	0	0	0	0	0	0	0	0	0	0	0	1	0	0	0	0	0	0	0
shandon	2013	34.9807	5.78	291.89	6017.2	0.34626	1318.74	4.51795	237.711	7.18443	5.67638	8.70238	-1.06056	5.47106	1.50806	shandon	1.7544	3.5548	1.1248	0	0	0	0	0	0	0	0	0	0	0	0	1	0	0	0	0	0	0
shandon	2014	1.81578	3.8	402.57	6903.48	0.344095	1488.31	3.69702	267.337	7.3054	5.99787	8.83978	-1.06684	5.58851	1.30753	shandon	1.335	0.596517	1.13814	0	0	0	0	0	0	0	0	0	0	0	0	0	1	0	0	0	0	0
shandon	2015	116.61	11.18	918.2	6967.89	0.233945	1630.4	1.77565	207.077	7.39658	6.82242	8.84907	-1.45267	5.33309	0.574165	shandon	2.41413	4.75883	2.11024	0	0	0	0	0	0	0	0	0	0	0	0	0	0	1	0	0	0	0
shandon	2016	8.36859	2.99	959.87	7493.21	0.17545	1670.59	1.74044	162.851	7.42093	6.8668	8.92175	-1.7404	5.09284	0.554136	shandon	1.09527	2.12449	3.029	0	0	0	0	0	0	0	0	0	0	0	0	0	0	0	1	0	0	0
shandon	2017	50.2202	9.86	870.77		0.146229	1912.06	2.19583	157.402	7.55594	6.76938		-1.92258	5.0588	0.786559	shandon	2.28849	3.91642	3.69633	0	0	0	0	0	0	0	0	0	0	0	0	0	0	0	0	1	0	0
shandon	2018	3.48271	3.84	1048.63		0.108141	2309.57	2.20246	142.826	7.74482	6.95524		-2.22432	4.96163	0.789575	shandon	1.34547	1.24781	4.9476	0	0	0	0	0	0	0	0	0	0	0	0	0	0	0	0	0	1	0
shandon	2019	2.84749	1.2	965.28	6070.64	0.087203	3060.17	3.17024	154.089	8.02623	6.87242	8.71122	-2.43951	5.03753	1.15381	shandon	0.182322	1.04644	5.95122	0	0	0	0	0	0	0	0	0	0	0	0	0	0	0	0	0	0	1
shanxi	2000	8.09687	2.21	30.37	57.6402	0.64123	98.0677	3.2291	27.5349	4.58566	3.41345	4.05422	-0.444368	3.31546	1.1722	shanxi	0.792992	2.09148	0.197463	0	0	0	0	0	0	0	0	0	0	0	0	0	0	0	0	0	0	0
shanxi	2001	18.1564	15.09	40.78	38.4482	0.64967	101.906	2.49893	28.8874	4.62406	3.70819	3.64931	-0.431291	3.3634	0.915864	shanxi	2.71403	2.89902	0.186012	1	0	0	0	0	0	0	0	0	0	0	0	0	0	0	0	0	0	0
shanxi	2002	37.5024	12.05	46.67	72.9235	0.734786	143.253	3.06948	44.972	4.96461	3.8431	4.28941	-0.308176	3.80604	1.12151	shanxi	2.48907	3.62441	0.0949727	0	1	0	0	0	0	0	0	0	0	0	0	0	0	0	0	0	0	0
shanxi	2003	1.7245	0.58	61.61	105.553	0.756597	166.257	2.69854	53.3902	5.11354	4.12082	4.65921	-0.278924	3.97763	0.992713	shanxi	-0.544727	0.544935	0.0777986	0	0	1	0	0	0	0	0	0	0	0	0	0	0	0	0	0	0	0
shanxi	2004	6.9578	3.21	66.5	139.893	0.403691	381.361	5.73475	78.308	5.94375	4.1972	4.94088	-0.907106	4.36065	1.74654	shanxi	1.16627	1.93986	0.822841	0	0	0	1	0	0	0	0	0	0	0	0	0	0	0	0	0	0	0
shanxi	2005	15.6377	7.5	72.01	177.777	0.366358	462.368	6.42089	86.9298	6.13636	4.27681	5.18053	-1.00415	4.4651	1.85956	shanxi	2.0149	2.74968	1.00831	0	0	0	0	1	0	0	0	0	0	0	0	0	0	0	0	0	0	0
shanxi	2006	48.7229	2.96	117.97	262.499	0.397382	469.33	3.97839	94.0813	6.15131	4.77043	5.57025	-0.922857	4.54416	1.38088	shanxi	1.08519	3.88615	0.851666	0	0	0	0	0	1	0	0	0	0	0	0	0	0	0	0	0	0	0
shanxi	2007	-6.67947	2.96	153.96	344.93	0.562098	480.929	3.12372	126.932	6.17572	5.03669	5.84334	-0.576079	4.84365	1.13903	shanxi	1.08519		0.331867	0	0	0	0	0	0	1	0	0	0	0	0	0	0	0	0	0	0	0
shanxi	2008	16.2914	7.21	140.83	386.456	0.569742	523.724	3.71884	139.388	6.26096	4.94755	5.95702	-0.562571	4.93726	1.31341	shanxi	1.97547	2.79064	0.316487	0	0	0	0	0	0	0	1	0	0	0	0	0	0	0	0	0	0	0
shanxi	2009	261.96	22.49	105.85	279.572	0.47732	419.23	3.96061	98.4402	6.03842	4.66202	5.63326	-0.739568	4.58945	1.3764	shanxi	3.11307	5.56819	0.546961	0	0	0	0	0	0	0	0	1	0	0	0	0	0	0	0	0	0	0
shanxi	2010	-7.44231	5.66	118.79	364.155	0.423191	419.465	3.53115	88.7172	6.03898	4.77736	5.89758	-0.859931	4.48545	1.26162	shanxi	1.73342		0.739481	0	0	0	0	0	0	0	0	0	1	0	0	0	0	0	0	0	0	0
shanxi	2011	75.3552	16.66	143.05	471.581	0.507724	411.687	2.87792	100.617	6.02026	4.96319	6.15609	-0.677817	4.61132	1.05707	shanxi	2.81301	4.32221	0.459437	0	0	0	0	0	0	0	0	0	0	1	0	0	0	0	0	0	0	0
shanxi	2012	14.9811	9.36	138.68	479.977	0.484503	411.758	2.96913	96.6393	6.02044	4.93217	6.17374	-0.724632	4.57099	1.08827	shanxi	2.23644	2.70679	0.525092	0	0	0	0	0	0	0	0	0	0	0	1	0	0	0	0	0	0	0
shanxi	2013	25.56	5.17	137.09	495.02	0.115448	716.112	5.22366	46.7358	6.57384	4.92064	6.2046	-2.15894	3.84451	1.6532	shanxi	1.64287	3.24103	4.66101	0	0	0	0	0	0	0	0	0	0	0	0	1	0	0	0	0	0	0
shanxi	2014	83.4604	15.37	122.39	562.614	0.267031	905.226	7.39624	129.574	6.80818	4.80721	6.33259	-1.32039	4.86425	2.00097	shanxi	2.73242	4.42437	1.74343	0	0	0	0	0	0	0	0	0	0	0	0	0	1	0	0	0	0	0
shanxi	2015	179.417	19.94	103.56	530.604	0.321676	764.321	7.38047	129.607	6.63899	4.64015	6.27402	-1.13421	4.86451	1.99884	shanxi	2.99273	5.18971	1.28643	0	0	0	0	0	0	0	0	0	0	0	0	0	0	1	0	0	0	0
shanxi	2016	17.8728	3.68	120.47	618.313	0.387435	865.594	7.18514	172.878	6.76342	4.7914	6.42699	-0.948206	5.15259	1.97202	shanxi	1.30291	2.88328	0.899095	0	0	0	0	0	0	0	0	0	0	0	0	0	0	0	1	0	0	0
shanxi	2017	155.262	29.95	132.11	761.198	0.313938	1068.27	8.08625	177.705	6.9738	4.88363	6.63489	-1.15856	5.18012	2.09016	shanxi	3.39953	5.04512	1.34226	0	0	0	0	0	0	0	0	0	0	0	0	0	0	0	0	1	0	0
shanxi	2018	40.6083	9.39	121.02	778.465	0.228541	1126.18	9.30576	140.728	7.02659	4.79596	6.65732	-1.47604	4.94683	2.23063	shanxi	2.23964	3.70397	2.17869	0	0	0	0	0	0	0	0	0	0	0	0	0	0	0	0	0	1	0
shanxi	2019	0.578363	0.08	104.42	826.18	0.193919	1206.41	11.5535	129.676	7.09541	4.64842	6.71681	-1.64031	4.86504	2.44699	shanxi	-2.52573	-0.547554	2.69062	0	0	0	0	0	0	0	0	0	0	0	0	0	0	0	0	0	0	1
guangdon	2000	1.64718	5	29.7		0.279941	149.847	5.04535	20.3556	5.00961	3.39115		-1.27317	3.01336	1.61847	guangdon	1.60944	0.499065	1.62098	0	0	0	0	0	0	0	0	0	0	0	0	0	0	0	0	0	0	0
guangdon	2001	2.7453	10.17	29.67	140.63	0.26832	167.812	5.65596	21.9091	5.12285	3.39014	4.94613	-1.31558	3.0869	1.73271	guangdon	2.31944	1.00989	1.73074	1	0	0	0	0	0	0	0	0	0	0	0	0	0	0	0	0	0	0
guangdon	2002	6.29865	12.15	28.21	166.54	0.253277	181.337	6.42812	22.4349	5.20036	3.33968	5.11524	-1.37327	3.11062	1.86068	guangdon	2.49733	1.84034	1.88588	0	1	0	0	0	0	0	0	0	0	0	0	0	0	0	0	0	0	0
guangdon	2003	6.00858	1.4	27.48	260.88	0.271952	234.383	8.52923	30.8423	5.45696	3.31346	5.56406	-1.30213	3.42889	2.1435	guangdon	0.336472	1.79319	1.69554	0	0	1	0	0	0	0	0	0	0	0	0	0	0	0	0	0	0	0
guangdon	2004	2.66242	4.19	29.84	449.4	0.130069	415.068	13.9098	28.3314	6.02844	3.39585	6.10791	-2.03969	3.34397	2.63259	guangdon	1.4327	0.979237	4.16034	0	0	0	1	0	0	0	0	0	0	0	0	0	0	0	0	0	0	0
guangdon	2005	4.20601	7.68	33.6	608.74	0.122104	479.762	14.2786	31.0302	6.17329	3.51453	6.41139	-2.10289	3.43496	2.65876	guangdon	2.03862	1.43651	4.42213	0	0	0	0	1	0	0	0	0	0	0	0	0	0	0	0	0	0	0
guangdon	2006	1.45035	1.48	28.76	936.25	0.096965	607.084	21.1086	31.7891	6.40867	3.35899	6.84188	-2.3334	3.45912	3.04968	guangdon	0.392042	0.371803	5.44478	0	0	0	0	0	1	0	0	0	0	0	0	0	0	0	0	0	0	0
guangdon	2007	2.13408	4.77	41.85	1349.43	0.122967	647.028	15.4606	42.2937	6.47239	3.73409	7.20744	-2.09584	3.74464	2.7383	guangdon	1.56235	0.758037	4.39255	0	0	0	0	0	0	1	0	0	0	0	0	0	0	0	0	0	0	0
guangdon	2008	3.50155	1.77	43.86	1600.57	0.130646	651.817	14.8613	45.2192	6.47976	3.781	7.37812	-2.03526	3.81152	2.69876	guangdon	0.570979	1.25321	4.1423	0	0	0	0	0	0	0	1	0	0	0	0	0	0	0	0	0	0	0
guangdon	2009	0.54906	2.08	43.94	1633.28	0.13167	683.963	15.5658	47.9471	6.5279	3.78282	7.39834	-2.02745	3.8701	2.74508	guangdon	0.732368	-0.599547	4.11057	0	0	0	0	0	0	0	0	1	0	0	0	0	0	0	0	0	0	0
guangdon	2010	2.94778	2.36	45.31	2121	0.141641	652.359	14.3977	48.9944	6.4806	3.81353	7.65964	-1.95446	3.8917	2.66707	guangdon	0.858662	1.08105	3.81991	0	0	0	0	0	0	0	0	0	1	0	0	0	0	0	0	0	0	0
guangdon	2011	7.68702	9.84	19.14	2347.12	0.108054	810.191	42.3297	47.9243	6.69727	2.95178	7.76094	-2.22512	3.86962	3.74549	guangdon	2.28646	2.03953	4.95118	0	0	0	0	0	0	0	0	0	0	1	0	0	0	0	0	0	0	0
guangdon	2012	3.45997	4.29	26.04	2249.66	0.101622	864.757	33.2088	48.8078	6.76245	3.25963	7.71853	-2.28649	3.88789	3.50282	guangdon	1.45629	1.24126	5.22804	0	0	0	0	0	0	0	0	0	0	0	1	0	0	0	0	0	0	0
guangdon	2013	1.77458	0.94	44.76	2829.77	0.096917	902.862	20.1712	48.4765	6.80557	3.80132	7.94795	-2.3339	3.88108	3.00426	guangdon	-0.0618754	0.573566	5.44708	0	0	0	0	0	0	0	0	0	0	0	0	1	0	0	0	0	0	0
guangdon	2014	0.441867	1.77	39.51	2953.99	0.100123	866.829	21.9395	47.9437	6.76484	3.67655	7.99091	-2.30136	3.87003	3.08829	guangdon	0.570979	-0.816747	5.29626	0	0	0	0	0	0	0	0	0	0	0	0	0	1	0	0	0	0	0
guangdon	2015	3.89497	5.38	36.56	2744.43	0.107643	799.437	21.8664	47.2669	6.68391	3.59896	7.91733	-2.22894	3.85581	3.08495	guangdon	1.68269	1.35969	4.96817	0	0	0	0	0	0	0	0	0	0	0	0	0	0	1	0	0	0	0
guangdon	2016	2.34639	1.19	36.29	3024.71	0.098909	1100.72	30.3313	60.2234	7.00372	3.59154	8.01457	-2.31356	4.09806	3.41218	guangdon	0.173953	0.85288	5.35255	0	0	0	0	0	0	0	0	0	0	0	0	0	0	0	1	0	0	0
guangdon	2017	1.09433	1.66	37.96	3086.95	0.092827	1305.22	34.3841	67.1972	7.17413	3.63653	8.03494	-2.37702	4.20763	3.5376	guangdon	0.506818	0.0901391	5.6502	0	0	0	0	0	0	0	0	0	0	0	0	0	0	0	0	1	0	0
guangdon	2018	1.90885	4.19	40.38	3161.57	0.098139	1199.74	29.7114	64.738	7.08986	3.69834	8.05882	-2.32137	4.17035	3.39153	guangdon	1.4327	0.646501	5.38875	0	0	0	0	0	0	0	0	0	0	0	0	0	0	0	0	0	1	0
guangdon	2019	34.1467	11.01	42.94	3625.65	0.106673	1184.39	27.5825	69.6524	7.07698	3.7598	8.19579	-2.23799	4.24352	3.31718	guangdon	2.3988	3.53066	5.00859	0	0	0	0	0	0	0	0	0	0	0	0	0	0	0	0	0	0	1
guangxi	2000	12.6786	7.16	60.96		0.776692	262.168	4.30066	96.2326	5.56899	4.11022		-0.252711	4.56677	1.45877	guangxi	1.96851	2.53992	0.0638629	0	0	0	0	0	0	0	0	0	0	0	0	0	0	0	0	0	0	0
guangxi	2001	7.34792	6.48	71.58	92.0854	0.768978	273.647	3.82295	97.9341	5.61184	4.27082	4.52272	-0.262693	4.58429	1.34102	guangxi	1.86872	1.99442	0.0690075	1	0	0	0	0	0	0	0	0	0	0	0	0	0	0	0	0	0	0
guangxi	2002	7.22904	6.3	60.09	69.749	0.717849	253.773	4.22321	85.5696	5.53644	4.09584	4.2449	-0.331496	4.44933	1.4406	guangxi	1.84055	1.97811	0.10989	0	1	0	0	0	0	0	0	0	0	0	0	0	0	0	0	0	0	0
guangxi	2003	1.18817	0.98	63.55	80.5317	0.400886	486.07	7.64862	102.381	6.18635	4.15183	4.38865	-0.914077	4.6287	2.03453	guangxi	-0.0202027	0.172415	0.835537	0	0	1	0	0	0	0	0	0	0	0	0	0	0	0	0	0	0	0
guangxi	2004	7.60901	5.68	63.21		0.325518	639.877	10.123	110.308	6.46128	4.14646		-1.12234	4.70328	2.31481	guangxi	1.73695	2.02933	1.25964	0	0	0	1	0	0	0	0	0	0	0	0	0	0	0	0	0	0	0
guangxi	2005	5.6248	6.68	66.36	157.22	0.216879	1011.08	15.2363	122.033	6.91878	4.1951	5.05765	-1.52842	4.80429	2.72368	guangxi	1.89912	1.72719	2.33605	0	0	0	0	1	0	0	0	0	0	0	0	0	0	0	0	0	0	0
guangxi	2006	1.92481	3.46	74.32	252.496	0.30303	906.942	12.2032	148.914	6.81008	4.30838	5.5314	-1.19392	5.00337	2.5017	guangxi	1.24127	0.654829	1.42546	0	0	0	0	0	1	0	0	0	0	0	0	0	0	0	0	0	0	0
guangxi	2007	41.4007	13.51	80.63	344.947	0.389141	807.205	10.0112	166.917	6.69358	4.38987	5.84339	-0.943812	5.1175	2.30371	guangxi	2.60343	3.7233	0.890782	0	0	0	0	0	0	1	0	0	0	0	0	0	0	0	0	0	0	0
guangxi	2008	12.4209	4.81	100.25	416.021	0.345854	914.322	9.12042	167.026	6.81818	4.60767	6.03074	-1.06174	5.11815	2.21052	guangxi	1.5707	2.51938	1.12729	0	0	0	0	0	0	0	1	0	0	0	0	0	0	0	0	0	0	0
guangxi	2009	0.008673	0.1	109.71	413.418	0.308069	1160.53	10.5781	190.774	7.05663	4.69784	6.02446	-1.17743	5.25109	2.35879	guangxi	-2.30259	-4.74757	1.38634	0	0	0	0	0	0	0	0	1	0	0	0	0	0	0	0	0	0	0
guangxi	2010	2.7744	4.6	141.62	631.201	0.264677	1344.11	9.49095	195.391	7.20349	4.95315	6.44763	-1.32925	5.275	2.25034	guangxi	1.52606	1.02043	1.76689	0	0	0	0	0	0	0	0	0	1	0	0	0	0	0	0	0	0	0
guangxi	2011	7.30747	9.75	133.45	838.507	0.302922	1263.57	9.46847	212.179	7.14169	4.89373	6.73162	-1.19428	5.35743	2.24797	guangxi	2.27727	1.9889	1.42631	0	0	0	0	0	0	0	0	0	0	1	0	0	0	0	0	0	0	0
guangxi	2012	10.9534	11.69	121.86	956.912	0.280683	1449.92	11.8982	229.229	7.27926	4.80287	6.86371	-1.27053	5.43472	2.47639	guangxi	2.45873	2.39365	1.61424	0	0	0	0	0	0	0	0	0	0	0	1	0	0	0	0	0	0	0
guangxi	2013	8.0193	1.52	123.65	1061.6	0.217152	1715.63	13.8749	217.828	7.44753	4.81745	6.96753	-1.52716	5.38371	2.63008	guangxi	0.41871	2.08185	2.33221	0	0	0	0	0	0	0	0	0	0	0	0	1	0	0	0	0	0	0
guangxi	2014	4.244	4.27	140.86	1062.31	0.194941	1891.98	13.4316	215.168	7.54538	4.94777	6.9682	-1.63506	5.37142	2.59761	guangxi	1.45161	1.44551	2.67341	0	0	0	0	0	0	0	0	0	0	0	0	0	1	0	0	0	0	0
guangxi	2015	2.61703	7.46	157.48	1118.59	0.186808	1821.56	11.5669	199.768	7.50745	5.0593	7.01982	-1.67768	5.29716	2.44815	guangxi	2.00956	0.96204	2.81459	0	0	0	0	0	0	0	0	0	0	0	0	0	0	1	0	0	0	0
guangxi	2016	1.09393	1.54	180.26	1266.23	0.198559	1788.77	9.92326	213.992	7.48928	5.1944	7.1438	-1.61667	5.36594	2.29488	guangxi	0.431782	0.0897777	2.61362	0	0	0	0	0	0	0	0	0	0	0	0	0	0	0	1	0	0	0
guangxi	2017	5.17826	5.12	230		0.170928	1932.51	8.40222	204.744	7.56658	5.43808		-1.76651	5.32176	2.1285	guangxi	1.63315	1.64447	3.12057	0	0	0	0	0	0	0	0	0	0	0	0	0	0	0	0	1	0	0
guangxi	2018	1.90645	1.85	309.6		0.160995	1911.23	6.17321	187.908	7.5555	5.73528		-1.82638	5.23595	1.82022	guangxi	0.615186	0.645245	3.33566	0	0	0	0	0	0	0	0	0	0	0	0	0	0	0	0	0	1	0
guangxi	2019	1.34075	1.89	373.77	1419.85	0.14188	2086.07	5.58116	181.908	7.64304	5.92364	7.25831	-1.95277	5.2035	1.7194	guangxi	0.636577	0.293227	3.81332	0	0	0	0	0	0	0	0	0	0	0	0	0	0	0	0	0	0	1
xinjiang	2000	28.7886	5.06	4.3	11.6391	0.865556	28.934	6.72883	10.3305	3.36502	1.45861	2.45437	-0.144384	2.3351	1.9064	xinjiang	1.62137	3.35998	0.0208466	0	0	0	0	0	0	0	0	0	0	0	0	0	0	0	0	0	0	0
xinjiang	2001	79.4534	15.71	3.79	11.6131	0.989195	14.5381	3.83592	6.19362	2.67678	1.33237	2.45214	-0.0108643	1.82352	1.34441	xinjiang	2.7543	4.37517	0.000118	1	0	0	0	0	0	0	0	0	0	0	0	0	0	0	0	0	0	0
xinjiang	2002	43.7328	7.056	4.28	13.3648	0.901441	25.1215	5.86952	9.15718	3.22373	1.45395	2.59263	-0.103761	2.21454	1.76977	xinjiang	1.95388	3.7781	0.0107663	0	1	0	0	0	0	0	0	0	0	0	0	0	0	0	0	0	0	0
xinjiang	2003	55.2609	4.9021	5.5	14.7485	0.895103	27.0141	4.91165	9.81059	3.29636	1.70475	2.69114	-0.110816	2.28346	1.59161	xinjiang	1.58966	4.01207	0.0122803	0	0	1	0	0	0	0	0	0	0	0	0	0	0	0	0	0	0	0
xinjiang	2004	101.666	14.56	5.9	18.9076	0.851538	21.3192	3.61342	7.66153	3.05961	1.77495	2.93956	-0.160712	2.03621	1.28465	xinjiang	2.67828	4.6217	0.0258283	0	0	0	1	0	0	0	0	0	0	0	0	0	0	0	0	0	0	0
xinjiang	2005	165.514	17.6832	5.81	25.1421	0.808219	34.3563	5.91331	11.4105	3.53679	1.75958	3.22454	-0.212922	2.43453	1.77721	xinjiang	2.87262	5.10905	0.0453359	0	0	0	0	1	0	0	0	0	0	0	0	0	0	0	0	0	0	0
xinjiang	2006	8.00229	0.9924	6.57	31.7973	0.772459	38.9122	5.92271	12.6357	3.66131	1.88251	3.45938	-0.258177	2.53653	1.77879	xinjiang	-0.007629	2.07973	0.0666553	0	0	0	0	0	1	0	0	0	0	0	0	0	0	0	0	0	0	0
xinjiang	2007	195.275	30.84	7.65	51.5156	0.834206	42.8255	5.5981	14.7805	3.75713	2.03471	3.94189	-0.181275	2.69331	1.72243	xinjiang	3.42881	5.27441	0.0328607	0	0	0	0	0	0	1	0	0	0	0	0	0	0	0	0	0	0	0
xinjiang	2008	47.0615	7.9	7.45	54.2834	0.886831	49.9152	6.70002	17.8489	3.91032	2.00821	3.99422	-0.120101	2.88194	1.90211	xinjiang	2.06686	3.85146	0.0144243	0	0	0	0	0	0	0	1	0	0	0	0	0	0	0	0	0	0	0
xinjiang	2009	1.06123	0.1018	6.58	41.7869	0.86357	28.8256	4.38079	9.18065	3.36126	1.88403	3.73258	-0.146681	2.2171	1.47723	xinjiang	-2.28475	0.0594318	0.0215152	0	0	0	0	0	0	0	0	1	0	0	0	0	0	0	0	0	0	0
xinjiang	2010	9.11925	4.71	9.33	73.7891	0.984256	266.537	28.5677	111.252	5.58551	2.23324	4.30121	-0.0158692	4.7118	3.35228	xinjiang	1.54969	2.21039	0.0002518	0	0	0	0	0	0	0	0	0	1	0	0	0	0	0	0	0	0	0
xinjiang	2011	57.2662	15.53	37.81	129.897	0.884198	47.3525	1.25238	16.185	3.85762	3.63257	4.86674	-0.123074	2.78408	0.225046	xinjiang	2.74277	4.04771	0.0151471	0	0	0	0	0	0	0	0	0	0	1	0	0	0	0	0	0	0	0
xinjiang	2012	4.75479	7.9371	108.95	214.128	0.906754	84.7112	0.777524	29.8858	4.43925	4.69089	5.36658	-0.0978835	3.39738	-0.251641	xinjiang	2.07155	1.55915	0.0095812	0	0	0	0	0	0	0	0	0	0	0	1	0	0	0	0	0	0	0
xinjiang	2013	44.039	3.7771	258.95	436.613	0.786735	39.1808	0.151306	11.6053	3.66819	5.55663	6.07905	-0.239863	2.45147	-1.88845	xinjiang	1.32896	3.78508	0.0575344	0	0	0	0	0	0	0	0	0	0	0	0	1	0	0	0	0	0	0
xinjiang	2014	16.2719	1.7615	445.09	628.628	0.93754	185.612	0.417022	73.4939	5.22366	6.09828	6.44354	-0.0644957	4.2972	-0.874616	xinjiang	0.566166	2.78944	0.0041597	0	0	0	0	0	0	0	0	0	0	0	0	0	1	0	0	0	0	0
xinjiang	2015	39.6614	5.187	601.44	847.75	0.945519	193.697	0.322056	77.8962	5.2663	6.39933	6.74259	-0.0560209	4.35538	-1.13303	xinjiang	1.64616	3.68038	0.0031383	0	0	0	0	0	0	0	0	0	0	0	0	0	0	1	0	0	0	0
xinjiang	2016	24.9395	3.61	651.66	874.189	0.984849	684.016	1.04965	287.271	6.52798	6.47952	6.7733	-0.0152672	5.66043	0.048458	xinjiang	1.28371	3.21645	0.0002331	0	0	0	0	0	0	0	0	0	0	0	0	0	0	0	1	0	0	0
xinjiang	2017	56.598	8.3602	663.86	1007.44	0.982841	757.67	1.14131	317.27	6.63025	6.49807	6.91517	-0.0173084	5.75975	0.132177	xinjiang	2.12348	4.03597	0.0002996	0	0	0	0	0	0	0	0	0	0	0	0	0	0	0	0	1	0	0
xinjiang	2018	3.87648	2.6072	642.13	1256.5	0.983375	616.229	0.959664	257.296	6.42362	6.46479	7.13608	-0.0167651	5.55023	-0.0411722	xinjiang	0.958277	1.35493	0.0002811	0	0	0	0	0	0	0	0	0	0	0	0	0	0	0	0	0	1	0
xinjiang	2019	3.93579	0.6844	619.57	1265.47	0.97559	557.857	0.900394	233.062	6.3241	6.42903	7.1432	-0.0247124	5.4513	-0.104923	xinjiang	-0.379213	1.37011	0.0006107	0	0	0	0	0	0	0	0	0	0	0	0	0	0	0	0	0	0	1
jiangsu	2000	-19.037	7.43	23.92	195.19	0.275593	54.6748	2.28573	6.80587	4.0014	3.17471	5.27397	-1.28883	1.91779	0.826687	jiangsu	2.00553		1.66108	0	0	0	0	0	0	0	0	0	0	0	0	0	0	0	0	0	0	0
jiangsu	2001	70.5121	15.43	19.5	213.33	0.253668	44.2579	2.26964	5.14204	3.79003	2.97041	5.36284	-1.37173	1.63745	0.81962	jiangsu	2.73631	4.25578	1.88164	1	0	0	0	0	0	0	0	0	0	0	0	0	0	0	0	0	0	0
jiangsu	2002	7.72462	7.73	25.45	241.99	0.275433	50.7183	1.99286	6.33102	3.92629	3.23672	5.4889	-1.28941	1.84546	0.68957	jiangsu	2.04511	2.04441	1.66258	0	1	0	0	0	0	0	0	0	0	0	0	0	0	0	0	0	0	0
jiangsu	2003	7.60018	1.3	19.87	354.88	0.243968	61.6226	3.10129	6.83475	4.12103	2.98921	5.87178	-1.41072	1.92202	1.13182	jiangsu	0.262364	2.02817	1.99012	0	0	1	0	0	0	0	0	0	0	0	0	0	0	0	0	0	0	0
jiangsu	2004	53.1355	13.99	22.9	515.92	0.28206	80.8563	3.53084	10.2957	4.39267	3.13114	6.24595	-1.26564	2.33173	1.26154	jiangsu	2.63834	3.97285	1.60183	0	0	0	1	0	0	0	0	0	0	0	0	0	0	0	0	0	0	0
jiangsu	2005	59.5337	13.78	28.7	775.14	0.333055	89.2169	3.1086	13.3822	4.49107	3.3569	6.65304	-1.09945	2.59393	1.13417	jiangsu	2.62322	4.08654	1.20878	0	0	0	0	1	0	0	0	0	0	0	0	0	0	0	0	0	0	0
jiangsu	2006	17.4746	3.6	31.89	1327.34	0.352292	92.2033	2.89129	14.6842	4.524	3.46229	7.19093	-1.0433	2.68677	1.0617	jiangsu	1.28093	2.86075	1.08847	0	0	0	0	0	1	0	0	0	0	0	0	0	0	0	0	0	0	0
jiangsu	2007	125.184	24.1	42.14	1758.76	0.359208	100.248	2.37893	16.4325	4.60765	3.741	7.47236	-1.02385	2.79926	0.86665	jiangsu	3.18221	4.82978	1.04828	0	0	0	0	0	0	1	0	0	0	0	0	0	0	0	0	0	0	0
jiangsu	2008	25.8647	8.98	40.99	1933.06	0.35125	106.448	2.59693	17.3628	4.66766	3.71333	7.56686	-1.04626	2.85433	0.954328	jiangsu	2.195	3.25288	1.09465	0	0	0	0	0	0	0	1	0	0	0	0	0	0	0	0	0	0	0
jiangsu	2009	0.297108	0.18	55.56	2069.24	0.368536	105.399	1.89702	17.9008	4.65775	4.01746	7.63494	-0.998216	2.88484	0.640286	jiangsu	-1.7148	-1.21366	0.996436	0	0	0	0	0	0	0	0	1	0	0	0	0	0	0	0	0	0	0
jiangsu	2010	10.5959	5.07	57.32	2656.03	0.38926	103.944	1.81341	18.8343	4.64386	4.04865	7.88459	-0.943509	2.93568	0.595208	jiangsu	1.62334	2.36047	0.890208	0	0	0	0	0	0	0	0	0	1	0	0	0	0	0	0	0	0	0
jiangsu	2011	41.0388	15.88	69.25	2697.61	0.42351	110.033	1.58892	21.5975	4.70078	4.23772	7.90012	-0.859179	3.07258	0.463057	jiangsu	2.76506	3.71452	0.738189	0	0	0	0	0	0	0	0	0	0	1	0	0	0	0	0	0	0	0
jiangsu	2012	18.7163	9.17	57.65	3105.08	0.382873	111.25	1.92974	20.2162	4.71178	4.05439	8.04079	-0.960052	3.00649	0.657388	jiangsu	2.21594	2.92939	0.9217	0	0	0	0	0	0	0	0	0	0	0	1	0	0	0	0	0	0	0
jiangsu	2013	35.5282	4.06	52.87	3413.69	0.344841	116.314	2.2	19.4321	4.75629	3.96784	8.13555	-1.06467	2.96693	0.788457	jiangsu	1.40118	3.57033	1.13353	0	0	0	0	0	0	0	0	0	0	0	0	1	0	0	0	0	0	0
jiangsu	2014	-0.367099	3.6	48.47	3459.72	0.336929	118.754	2.45006	19.487	4.77706	3.88095	8.14894	-1.08788	2.96975	0.896113	jiangsu	1.28093		1.18349	0	0	0	0	0	0	0	0	0	0	0	0	0	1	0	0	0	0	0
jiangsu	2015	57.9669	10.41	39.76	3695.48	0.34296	122.984	3.09316	20.6426	4.81205	3.68286	8.21487	-1.07014	3.02736	1.12919	jiangsu	2.34277	4.05987	1.1452	0	0	0	0	0	0	0	0	0	0	0	0	0	0	1	0	0	0	0
jiangsu	2016	5.65035	3.93	33.87	3795.33	0.342482	127.06	3.75141	21.2827	4.84466	3.52253	8.24153	-1.07154	3.05789	1.32213	jiangsu	1.36864	1.73172	1.14819	0	0	0	0	0	0	0	0	0	0	0	0	0	0	0	1	0	0	0
jiangsu	2017	11.5918	7.48	43.44	3779.42	0.333147	125.843	2.89694	20.5738	4.83503	3.77138	8.23733	-1.09917	3.02402	1.06365	jiangsu	2.01223	2.4503	1.20818	0	0	0	0	0	0	0	0	0	0	0	0	0	0	0	0	1	0	0
jiangsu	2018	9.59305	3.06	37.7	3453.68	0.276444	134.906	3.5784	18.8799	4.90458	3.62966	8.1472	-1.28575	2.9381	1.27492	jiangsu	1.11841	2.26104	1.65315	0	0	0	0	0	0	0	0	0	0	0	0	0	0	0	0	0	1	0
jiangsu	2019	1.01586	1.98	72.6	3935.94	0.288191	144.81	1.99462	20.9275	4.97542	4.28496	8.27791	-1.24413	3.04106	0.690455	jiangsu	0.683097	0.0157389	1.54787	0	0	0	0	0	0	0	0	0	0	0	0	0	0	0	0	0	0	1
jiangxi	2000	6.79895	2.88	22.5	75.1356	0.446836	48.1568	2.1403	9.89534	3.87446	3.11352	4.31929	-0.805565	2.29206	0.760948	jiangxi	1.05779	1.91677	0.648934	0	0	0	0	0	0	0	0	0	0	0	0	0	0	0	0	0	0	0
jiangxi	2001	43.8956	14.81	26.07	83.7532	0.446147	49.7826	1.90957	10.062	3.90767	3.26078	4.42788	-0.807107	2.30877	0.646879	jiangxi	2.6953	3.78181	0.651422	1	0	0	0	0	0	0	0	0	0	0	0	0	0	0	0	0	0	0
jiangxi	2002	99.418	10.58	27.54	99.1883	0.471179	36.7434	1.33418	7.86281	3.60396	3.31564	4.59702	-0.752517	2.06214	0.288319	jiangxi	2.35896	4.59933	0.566282	0	1	0	0	0	0	0	0	0	0	0	0	0	0	0	0	0	0	0
jiangxi	2003	1.48903	0.77	39.98	158.182	0.387853	40.5738	1.01485	7.3538	3.70312	3.68838	5.06375	-0.947129	1.99522	0.0147444	jiangxi	-0.261365	0.398123	0.897053	0	0	1	0	0	0	0	0	0	0	0	0	0	0	0	0	0	0	0
jiangxi	2004	10.0682	3.14	46.21	255.65	0.363456	57.3656	1.24141	9.4938	4.04945	3.8332	5.54381	-1.0121	2.25064	0.216249	jiangxi	1.14422	2.30938	1.02434	0	0	0	1	0	0	0	0	0	0	0	0	0	0	0	0	0	0	0
jiangxi	2005	25.3376	9.58	50.09	358.992	0.387444	50.772	1.01362	9.02097	3.92735	3.91382	5.8833	-0.948184	2.19955	0.0135242	jiangxi	2.25968	3.23229	0.899053	0	0	0	0	1	0	0	0	0	0	0	0	0	0	0	0	0	0	0
jiangxi	2006	11.3953	1.27	54.38	645.092	0.476489	71.8932	1.32205	15.5893	4.27518	3.996	6.46939	-0.741311	2.74659	0.279185	jiangxi	0.239017	2.4332	0.549542	0	0	0	0	0	1	0	0	0	0	0	0	0	0	0	0	0	0	0
jiangxi	2007	3.20281	2.47	67.68	1325.49	0.447024	96.1684	1.42093	19.7752	4.5661	4.21479	7.18954	-0.805142	2.98443	0.35131	jiangxi	0.904218	1.16403	0.648254	0	0	0	0	0	0	1	0	0	0	0	0	0	0	0	0	0	0	0
jiangxi	2008	25.5578	6.12	89.56	1754.13	0.758532	81.0552	0.905038	27.1566	4.39513	4.49491	7.46973	-0.27637	3.30162	-0.0997783	jiangxi	1.81156	3.24094	0.0763804	0	0	0	0	0	0	0	1	0	0	0	0	0	0	0	0	0	0	0
jiangxi	2009	143.634	19.83	94.23	1744.6	0.418586	98.7823	1.04831	19.3056	4.59292	4.54574	7.46428	-0.870872	2.96039	0.0471794	jiangxi	2.9872	4.96727	0.758417	0	0	0	0	0	0	0	0	1	0	0	0	0	0	0	0	0	0	0
jiangxi	2010	7.74576	7.43	111.71	2680.38	0.281254	175.478	1.57083	23.3983	5.16751	4.71591	7.89371	-1.2685	3.15266	0.451607	jiangxi	2.00553	2.04715	1.60909	0	0	0	0	0	0	0	0	0	1	0	0	0	0	0	0	0	0	0
jiangxi	2011	89.8036	17.02	115.27	3738.65	0.290931	169.47	1.4702	22.3733	5.13268	4.74728	8.22648	-1.23467	3.10787	0.385401	jiangxi	2.83439	4.49763	1.52441	0	0	0	0	0	0	0	0	0	0	1	0	0	0	0	0	0	0	0
jiangxi	2012	31.4049	9.35	145.32	4681.05	0.298785	204.842	1.4096	27.8711	5.32224	4.97894	8.45128	-1.20803	3.32759	0.343303	jiangxi	2.23538	3.44697	1.45934	0	0	0	0	0	0	0	0	0	0	0	1	0	0	0	0	0	0	0
jiangxi	2013	13.064	1.76	156.22	5540.69	0.311177	195.576	1.25193	27.4988	5.27595	5.05126	8.61987	-1.16739	3.31414	0.224683	jiangxi	0.565314	2.56986	1.36281	0	0	0	0	0	0	0	0	0	0	0	0	1	0	0	0	0	0	0
jiangxi	2014	64.1108	15.39	165.1	6121.32	0.331441	204.876	1.24092	30.4382	5.3224	5.10655	8.71953	-1.10431	3.4157	0.215853	jiangxi	2.73372	4.16061	1.21949	0	0	0	0	0	0	0	0	0	0	0	0	0	1	0	0	0	0	0
jiangxi	2015	98.4284	15.04	167.8	6078.93	0.330997	200.491	1.19482	29.9349	5.30077	5.12277	8.71258	-1.10565	3.39902	0.177999	jiangxi	2.71071	4.58933	1.22246	0	0	0	0	0	0	0	0	0	0	0	0	0	0	1	0	0	0	0
jiangxi	2016	17.5621	3.45	161.14	6361.93	0.362823	170.129	1.05578	27.7711	5.13656	5.08227	8.75809	-1.01384	3.324	0.0542816	jiangxi	1.23837	2.86574	1.02787	0	0	0	0	0	0	0	0	0	0	0	0	0	0	0	1	0	0	0
jiangxi	2017	144.079	26.02	174.22	6276.34	0.302123	178.352	1.02372	24.5984	5.18376	5.16032	8.74454	-1.19692	3.20268	0.0234382	jiangxi	3.25887	4.97036	1.43262	0	0	0	0	0	0	0	0	0	0	0	0	0	0	0	0	1	0	0
jiangxi	2018	42.1632	10.07	163.7	5670.5	0.240619	149.739	0.914717	16.6917	5.00889	5.09804	8.64303	-1.42454	2.81491	-0.0891407	jiangxi	2.30956	3.74155	2.02932	0	0	0	0	0	0	0	0	0	0	0	0	0	0	0	0	0	1	0
jiangxi	2019	0.414235	0.19	186.6	6140.36	0.050554	564.3	3.02412	16.2369	6.33559	5.22897	8.72264	-2.98471	2.78729	1.10662	jiangxi	-1.66073	-0.881323	8.90851	0	0	0	0	0	0	0	0	0	0	0	0	0	0	0	0	0	0	1
hebei	2000	14.0204	8.88	5.14	52.3	0.497411	21.314	4.14669	4.83536	3.05937	1.63705	3.957	-0.698339	1.57596	1.42231	hebei	2.1838	2.64052	0.487677	0	0	0	0	0	0	0	0	0	0	0	0	0	0	0	0	0	0	0
hebei	2001	18.6759	10.99	6.2	58.86	0.519348	21.6224	3.48748	5.08586	3.07373	1.82455	4.07516	-0.655181	1.62647	1.24918	hebei	2.39699	2.92723	0.429262	1	0	0	0	0	0	0	0	0	0	0	0	0	0	0	0	0	0	0
hebei	2002	16.1891	7.13	10.81	69.01	0.526946	24.3029	2.24819	5.76027	3.1906	2.38047	4.23425	-0.640657	1.75099	0.810125	hebei	1.96431	2.78434	0.410442	0	1	0	0	0	0	0	0	0	0	0	0	0	0	0	0	0	0	0
hebei	2003	3.75489	1.12	11.06	84.69	0.550932	27.4672	2.48347	6.69243	3.31299	2.40334	4.439	-0.596144	1.90098	0.909659	hebei	0.113329	1.32306	0.355388	0	0	1	0	0	0	0	0	0	0	0	0	0	0	0	0	0	0	0
hebei	2004	16.7856	7.77	12.78	113.07	0.608529	27.9275	2.18525	7.55127	3.32961	2.54788	4.72801	-0.49671	2.02172	0.781732	hebei	2.05027	2.82052	0.246721	0	0	0	1	0	0	0	0	0	0	0	0	0	0	0	0	0	0	0
hebei	2005	26.618	7.13	12.68	136.75	0.571253	35.5958	2.80724	9.69857	3.57223	2.54003	4.91815	-0.559924	2.27198	1.0322	hebei	1.96431	3.28159	0.313514	0	0	0	0	1	0	0	0	0	0	0	0	0	0	0	0	0	0	0
hebei	2006	3.63291	3.4	4.25	170.48	0.555346	41.5998	9.7882	10.7602	3.7281	1.44692	5.13862	-0.588164	2.37586	2.28118	hebei	1.22378	1.29003	0.345937	0	0	0	0	0	1	0	0	0	0	0	0	0	0	0	0	0	0	0
hebei	2007	74.2585	15.74	0.55	203.47	0.56163	47.5504	86.4553	12.3288	3.86179	-0.597837	5.31552	-0.576912	2.51194	4.45963	hebei	2.75621	4.30755	0.332827	0	0	0	0	0	0	1	0	0	0	0	0	0	0	0	0	0	0	0
hebei	2008	20.3594	7.69	0.72	232.91	0.694199	44.6592	62.0267	13.5773	3.79906	-0.328504	5.45065	-0.364997	2.6084	4.12756	hebei	2.03992	3.01354	0.133223	0	0	0	0	0	0	0	1	0	0	0	0	0	0	0	0	0	0	0
hebei	2009	-0.029146	0.1	8.33	275.56	0.695447	44.8344	5.38228	13.6157	3.80297	2.11986	5.61881	-0.363201	2.61123	1.68311	hebei	-2.30259		0.131915	0	0	0	0	0	0	0	0	1	0	0	0	0	0	0	0	0	0	0
hebei	2010	4.97121	4.18	13.43	349.95	0.608629	48.5895	3.61798	12.9201	3.88341	2.59749	5.85779	-0.496546	2.55878	1.28592	hebei	1.43031	1.60366	0.246558	0	0	0	0	0	0	0	0	0	1	0	0	0	0	0	0	0	0	0
hebei	2011	15.8893	11.05	13.88	436.26	0.605691	55.6313	4.00802	15.033	4.01875	2.63045	6.07824	-0.501385	2.71025	1.3883	hebei	2.40243	2.76565	0.251387	0	0	0	0	0	0	0	0	0	0	1	0	0	0	0	0	0	0	0
hebei	2012	19.1866	10.45	17.1	482.09	0.597186	54.1782	3.16832	14.1808	3.99228	2.83908	6.17813	-0.515527	2.65189	1.1532	hebei	2.3466	2.95421	0.265768	0	0	0	0	0	0	0	0	0	0	0	1	0	0	0	0	0	0	0
hebei	2013	14.1631	2.24	19.38	527.55	0.618638	52.5373	2.71091	14.2523	3.96152	2.96424	6.26824	-0.480234	2.65692	0.997283	hebei	0.806476	2.65064	0.230625	0	0	0	0	0	0	0	0	0	0	0	0	1	0	0	0	0	0	0
hebei	2014	10.7679	3.96	17.34	515.01	0.626073	52.1807	3.00927	14.3243	3.95471	2.85302	6.24419	-0.468288	2.66196	1.1017	hebei	1.37624	2.37657	0.219294	0	0	0	0	0	0	0	0	0	0	0	0	0	1	0	0	0	0	0
hebei	2015	12.3396	8.53	14.57	483.48	0.595649	51.6598	3.54563	14.0542	3.94468	2.67896	6.18101	-0.518103	2.64292	1.26572	hebei	2.14359	2.51281	0.268431	0	0	0	0	0	0	0	0	0	0	0	0	0	0	1	0	0	0	0
hebei	2016	1.9682	1.88	11.89	514.08	0.638066	52.5244	4.41753	15.148	3.96128	2.4757	6.24238	-0.449313	2.71787	1.48558	hebei	0.631272	0.677119	0.201882	0	0	0	0	0	0	0	0	0	0	0	0	0	0	0	1	0	0	0
hebei	2017	40.4757	5.63	6.33	426.57	0.6137	53.0593	8.38219	14.8529	3.97141	1.8453	6.05578	-0.48825	2.6982	2.12611	hebei	1.72811	3.7007	0.238388	0	0	0	0	0	0	0	0	0	0	0	0	0	0	0	0	1	0	0
hebei	2018	11.1054	2.17	3.17		0.470496	65.6162	20.6991	14.9626	4.18382	1.15373		-0.753969	2.70555	3.03009	hebei	0.774727	2.40743	0.568469	0	0	0	0	0	0	0	0	0	0	0	0	0	0	0	0	0	1	0
hebei	2019	3.48859	1.92	4	447.77	0.561871	58.3519	14.588	15.2884	4.06649	1.38629	6.10428	-0.576483	2.72709	2.6802	hebei	0.652325	1.2495	0.332333	0	0	0	0	0	0	0	0	0	0	0	0	0	0	0	0	0	0	1
henan	2000	5.68549	4.13	70.92		0.394326	347.966	4.90646	71.5713	5.85211	4.26155		-0.930578	4.27069	1.59055	henan	1.41828	1.73792	0.865975	0	0	0	0	0	0	0	0	0	0	0	0	0	0	0	0	0	0	0
henan	2001	56.4351	11.86	106.53	211.89	0.394678	406.276	3.81372	83.1807	6.00703	4.66843	5.35607	-0.929686	4.42101	1.33861	henan	2.47317	4.03309	0.864316	1	0	0	0	0	0	0	0	0	0	0	0	0	0	0	0	0	0	0
henan	2002	39.8298	6.71	145.26	235.59	0.37388	395.079	2.71981	76.6753	5.97909	4.97853	5.46209	-0.983822	4.33958	1.00056	henan	1.9036	3.68462	0.967905	0	1	0	0	0	0	0	0	0	0	0	0	0	0	0	0	0	0	0
henan	2003	0.587945	0.72	198.52	305.06	0.399186	454.867	2.29129	91.9398	6.12	5.29089	5.72051	-0.918328	4.52113	0.829114	henan	-0.328504	-0.531122	0.843326	0	0	1	0	0	0	0	0	0	0	0	0	0	0	0	0	0	0	0
henan	2004	5.35647	1.86	237.47		0.480837	543.763	2.28982	131.62	6.29851	5.47004		-0.732226	4.87992	0.828472	henan	0.620576	1.67831	0.536155	0	0	0	1	0	0	0	0	0	0	0	0	0	0	0	0	0	0	0
henan	2005	23.8739	5.97	294.86	757.17	0.556566	757.792	2.57001	203.813	6.63041	5.6865	6.62959	-0.585969	5.3172	0.943909	henan	1.78675	3.17279	0.343359	0	0	0	0	1	0	0	0	0	0	0	0	0	0	0	0	0	0	0
henan	2006	0.945561	0.71	323.81	1194.63	0.641672	1081.39	3.33958	320.456	6.986	5.78016	7.08559	-0.443678	5.76974	1.20584	henan	-0.34249	-0.0559773	0.19685	0	0	0	0	0	1	0	0	0	0	0	0	0	0	0	0	0	0	0
henan	2007	4.79448	1.76	438.96	1815.17	0.597004	1262.28	2.87563	348.575	7.14068	6.08441	7.50393	-0.515831	5.85385	1.05627	henan	0.565314	1.56747	0.266082	0	0	0	0	0	0	1	0	0	0	0	0	0	0	0	0	0	0	0
henan	2008	12.9534	4.48	475.07	2377.42	0.560783	1354.62	2.85141	354.312	7.21128	6.16346	7.77377	-0.578421	5.87018	1.04781	henan	1.49962	2.56135	0.33457	0	0	0	0	0	0	0	1	0	0	0	0	0	0	0	0	0	0	0
henan	2009	70.2595	15.22	481.62	2523.02	0.593088	1633.54	3.39176	447.23	7.3985	6.17715	7.83321	-0.522412	6.10307	1.22135	henan	2.72261	4.2522	0.272915	0	0	0	0	0	0	0	0	1	0	0	0	0	0	0	0	0	0	0
henan	2010	30.71	7.74	516.69	3326.55	0.509229	1695.58	3.28161	407.219	7.43578	6.24744	8.10969	-0.674858	6.00935	1.18833	henan	2.0464	3.42459	0.455434	0	0	0	0	0	0	0	0	0	1	0	0	0	0	0	0	0	0	0
henan	2011	26.95	12.69	564.34	4265.49	0.683187	1498.7	2.65567	446.875	7.31236	6.33566	8.35831	-0.380986	6.10228	0.976698	henan	2.54081	3.29398	0.14515	0	0	0	0	0	0	0	0	0	0	1	0	0	0	0	0	0	0	0
henan	2012	21.4821	5.86	568.69	4679.59	0.46323	1476.34	2.59604	330.404	7.29732	6.34334	8.45097	-0.769533	5.80032	0.953986	henan	1.76815	3.06722	0.592181	0	0	0	0	0	0	0	0	0	0	0	1	0	0	0	0	0	0	0
henan	2013	10.1029	1.19	536.3	5244.71	0.413022	1315.59	2.45308	264.661	7.18204	6.28469	8.56498	-0.884254	5.57845	0.897346	henan	0.173953	2.31282	0.781906	0	0	0	0	0	0	0	0	0	0	0	0	1	0	0	0	0	0	0
henan	2014	25.4641	8.87	529.79	5772.22	0.442489	1438.73	2.71567	298.829	7.27152	6.27248	8.66081	-0.81534	5.69987	0.999039	henan	2.18268	3.23727	0.664779	0	0	0	0	0	0	0	0	0	0	0	0	0	1	0	0	0	0	0
henan	2015	52.4231	8.17	521.35	6106.22	0.379727	1343.93	2.57778	247.045	7.20335	6.25642	8.71706	-0.968303	5.50957	0.94693	henan	2.10047	3.95935	0.937611	0	0	0	0	0	0	0	0	0	0	0	0	0	0	1	0	0	0	0
henan	2016	4.2316	3.7	543.23	6295.45	0.377808	1478.93	2.72248	271.674	7.29908	6.29753	8.74758	-0.973369	5.6046	1.00154	henan	1.30833	1.44258	0.947448	0	0	0	0	0	0	0	0	0	0	0	0	0	0	0	1	0	0	0
henan	2017	117.978	17.12	543.17	6219.81	0.412018	1341.95	2.4706	287.74	7.20188	6.29742	8.7355	-0.886689	5.66206	0.90446	henan	2.84025	4.7705	0.786218	0	0	0	0	0	0	0	0	0	0	0	0	0	0	0	0	1	0	0
henan	2018	29.082	9	471.01	4273.98	0.398439	1481.02	3.14436	314.482	7.30049	6.15488	8.3603	-0.920201	5.75093	1.14561	henan	2.19722	3.37012	0.84677	0	0	0	0	0	0	0	0	0	0	0	0	0	0	0	0	0	1	0
henan	2019	0.033903	0.12	435.55	4369.99	0.378417	1359.4	3.1211	275.134	7.2148	6.07661	8.38252	-0.971758	5.61726	1.13819	henan	-2.12026	-3.38426	0.944314	0	0	0	0	0	0	0	0	0	0	0	0	0	0	0	0	0	0	1
zhejiang	2000	24.014	4.38	11.9		0.428379	33.8982	2.84859	6.46611	3.52336	2.47654		-0.847746	1.86658	1.04682	zhejiang	1.47705	3.17864	0.718673	0	0	0	0	0	0	0	0	0	0	0	0	0	0	0	0	0	0	0
zhejiang	2001	22.4091	11.8	13.16	157.19	0.413443	34.9226	2.6537	6.47608	3.55314	2.57718	5.05746	-0.883236	1.86812	0.975953	zhejiang	2.4681	3.10947	0.780105	1	0	0	0	0	0	0	0	0	0	0	0	0	0	0	0	0	0	0
zhejiang	2002	15.6532	8.166	12.26	191.27	0.453731	36.7534	2.99783	7.46239	3.60423	2.50634	5.25369	-0.79025	2.00988	1.09789	zhejiang	2.09998	2.75068	0.624496	0	1	0	0	0	0	0	0	0	0	0	0	0	0	0	0	0	0	0
zhejiang	2003	112.092	4.4187	21.86	288.28	0.534001	46.8898	2.145	11.6241	3.8478	3.08466	5.66393	-0.627357	2.45308	0.763142	zhejiang	1.48585	4.71932	0.393577	0	0	1	0	0	0	0	0	0	0	0	0	0	0	0	0	0	0	0
zhejiang	2004	8.1734	1.1889	30.92	523.48	0.508854	67.7642	2.1916	16.1136	4.21603	3.4314	6.2605	-0.675594	2.77966	0.78463	zhejiang	0.173029	2.10088	0.456427	0	0	0	1	0	0	0	0	0	0	0	0	0	0	0	0	0	0	0
zhejiang	2005	40.9714	4.2095	34.99	713.23	0.311315	75.4892	2.15745	10.6736	4.32399	3.55506	6.5698	-1.16695	2.36777	0.768927	zhejiang	1.43734	3.71287	1.36177	0	0	0	0	1	0	0	0	0	0	0	0	0	0	0	0	0	0	0
zhejiang	2006	21.6882	2.59	37.03	1150.6	0.334366	79.9663	2.1595	11.9893	4.38161	3.61173	7.04804	-1.09552	2.48402	0.769876	zhejiang	0.951658	3.07677	1.20016	0	0	0	0	0	1	0	0	0	0	0	0	0	0	0	0	0	0	0
zhejiang	2007	42.7853	7.9402	48.69	1331.41	0.328301	83.7123	1.71929	12.3656	4.42739	3.88547	7.19399	-1.11382	2.51492	0.541912	zhejiang	2.07194	3.75619	1.2406	0	0	0	0	0	0	1	0	0	0	0	0	0	0	0	0	0	0	0
zhejiang	2008	3.5697	2.8865	45.67	1339.82	0.375723	91.1221	1.99523	15.0773	4.5122	3.82144	7.20029	-0.978902	2.71319	0.690759	zhejiang	1.06004	1.27248	0.95825	0	0	0	0	0	0	0	1	0	0	0	0	0	0	0	0	0	0	0
zhejiang	2009	8.5955	0.6737	41.75	1168.54	0.372637	90.4915	2.16746	14.8432	4.50526	3.7317	7.06351	-0.987151	2.69754	0.773556	zhejiang	-0.39497	2.15124	0.974467	0	0	0	0	0	0	0	0	1	0	0	0	0	0	0	0	0	0	0
zhejiang	2010	7.07977	1.32	53.04	1698.26	0.403972	82.7143	1.55947	14.7377	4.41539	3.97105	7.43736	-0.906408	2.69041	0.444346	zhejiang	0.277632	1.95724	0.821577	0	0	0	0	0	0	0	0	0	1	0	0	0	0	0	0	0	0	0
zhejiang	2011	39.1346	10.8	53.86	1959.86	0.421871	82.9187	1.53952	15.3642	4.41786	3.98639	7.58063	-0.863055	2.73204	0.431473	zhejiang	2.37955	3.66701	0.744864	0	0	0	0	0	0	0	0	0	0	1	0	0	0	0	0	0	0	0
zhejiang	2012	28.6751	7.4	48.23	1959.46	0.423849	80.0058	1.65884	14.9941	4.3821	3.87598	7.58042	-0.858377	2.70766	0.506118	zhejiang	2.00148	3.35603	0.736811	0	0	0	0	0	0	0	0	0	0	0	1	0	0	0	0	0	0	0
zhejiang	2013	1.71748	0.27	38.52	2163.63	0.456134	75.121	1.95018	15.2493	4.3191	3.65118	7.67954	-0.784968	2.72453	0.667923	zhejiang	-1.30933	0.540857	0.616175	0	0	0	0	0	0	0	0	0	0	0	0	1	0	0	0	0	0	0
zhejiang	2014	-16.1334	1.57	35.61	2355.12	0.44612	77.307	2.17094	15.4873	4.34779	3.57263	7.76435	-0.807168	2.74002	0.775158	zhejiang	0.451076		0.65152	0	0	0	0	0	0	0	0	0	0	0	0	0	1	0	0	0	0	0
zhejiang	2015	28.0051	5.09	42.08	2316.33	0.425201	82.8854	1.96971	16.2691	4.41746	3.73957	7.74774	-0.855192	2.78927	0.677886	zhejiang	1.62728	3.33239	0.731354	0	0	0	0	0	0	0	0	0	0	0	0	0	0	1	0	0	0	0
zhejiang	2016	1.28121	1.42	42.62	2185.86	0.429708	76.2641	1.7894	15.7714	4.3342	3.75232	7.68976	-0.844648	2.7582	0.581878	zhejiang	0.350657	0.247802	0.713431	0	0	0	0	0	0	0	0	0	0	0	0	0	0	0	1	0	0	0
zhejiang	2017	-1.5739	1.03	40.75	2147.74	0.391861	73.3609	1.80027	14.0961	4.29539	3.70746	7.67217	-0.936848	2.6459	0.587935	zhejiang	0.0295588		0.877684	0	0	0	0	0	0	0	0	0	0	0	0	0	0	0	0	1	0	0
zhejiang	2018	18.971	6.11	56.44	2680.03	0.359988	73.0091	1.29357	13.1444	4.29058	4.03318	7.89358	-1.02168	2.576	0.257406	zhejiang	1.80993	2.94291	1.04384	0	0	0	0	0	0	0	0	0	0	0	0	0	0	0	0	0	1	0
zhejiang	2019	110.305	18.29	63.06	2628.1	0.338976	74.5172	1.18169	12.8097	4.31103	4.14409	7.87402	-1.08183	2.5502	0.166943	zhejiang	2.90635	4.70325	1.17035	0	0	0	0	0	0	0	0	0	0	0	0	0	0	0	0	0	0	1
hubei	2000	30.5553	8.08	27.97		0.669191	55.2655	1.97589	15.8141	4.01215	3.33113		-0.401685	2.7609	0.681017	hubei	2.08939	3.41954	0.161351	0	0	0	0	0	0	0	0	0	0	0	0	0	0	0	0	0	0	0
hubei	2001	38.6319	14.58	31.91	57.21	0.684159	50.255	1.5749	14.5376	3.91711	3.46292	4.04673	-0.379566	2.67674	0.454192	hubei	2.67965	3.65408	0.14407	1	0	0	0	0	0	0	0	0	0	0	0	0	0	0	0	0	0	0
hubei	2002	19.8503	7.33	36.86	71.28	0.894052	126.035	3.41928	47.9774	4.83656	3.60713	4.26662	-0.111991	3.87073	1.22943	hubei	1.99198	2.98822	0.012542	0	1	0	0	0	0	0	0	0	0	0	0	0	0	0	0	0	0	0
hubei	2003	14.7467	1.39	37.81	56.44	0.695385	49.1616	1.30023	14.4337	3.89511	3.63257	4.03318	-0.36329	2.66956	0.26254	hubei	0.329304	2.69102	0.13198	0	0	1	0	0	0	0	0	0	0	0	0	0	0	0	0	0	0	0
hubei	2004	22.5752	10.29	38.47		0.872919	134.835	3.50493	50.2223	4.90405	3.64988		-0.135912	3.91646	1.25417	hubei	2.33117	3.11685	0.0184721	0	0	0	1	0	0	0	0	0	0	0	0	0	0	0	0	0	0	0
hubei	2005	48.9193	10.18	44.31	160.85	0.83115	157.797	3.5612	57.034	5.06131	3.79121	5.08047	-0.184945	4.04365	1.2701	hubei	2.32043	3.89017	0.0342046	0	0	0	0	1	0	0	0	0	0	0	0	0	0	0	0	0	0	0
hubei	2006	5.46795	3.64	52.48	234.76	0.788707	132.071	2.5166	46.8535	4.88334	3.96043	5.45856	-0.237361	3.84703	0.92291	hubei	1.29198	1.6989	0.0563401	0	0	0	0	0	1	0	0	0	0	0	0	0	0	0	0	0	0	0
hubei	2007	154.565	18.8	71.04	313.58	0.793745	148.09	2.08461	51.7251	4.99782	4.26324	5.74805	-0.230993	3.94594	0.73458	hubei	2.93386	5.04061	0.0533576	0	0	0	0	0	0	1	0	0	0	0	0	0	0	0	0	0	0	0
hubei	2008	22.3838	9.67	76.87	401.38	0.822513	158.692	2.06443	58.1496	5.06697	4.34212	5.99491	-0.195391	4.06302	0.724853	hubei	2.26903	3.10834	0.0381777	0	0	0	0	0	0	0	1	0	0	0	0	0	0	0	0	0	0	0
hubei	2009	0.089766	0.88	66.77	480.35	0.789805	151.512	2.26916	54.1803	5.02066	4.20125	6.17452	-0.23597	3.99232	0.81941	hubei	-0.127833	-2.41055	0.0556817	0	0	0	0	0	0	0	0	1	0	0	0	0	0	0	0	0	0	0
hubei	2010	9.46474	4.56	86.41	714.68	0.859389	185.914	2.15153	68.3273	5.22528	4.4591	6.57184	-0.151533	4.22431	0.76618	hubei	1.51732	2.24757	0.0229623	0	0	0	0	0	0	0	0	0	1	0	0	0	0	0	0	0	0	0
hubei	2011	23.4744	14.17	94.97	897.65	0.837896	177.131	1.86513	63.2735	5.17689	4.55356	6.79978	-0.176861	4.14747	0.62333	hubei	2.65113	3.15591	0.0312799	0	0	0	0	0	0	0	0	0	0	1	0	0	0	0	0	0	0	0
hubei	2012	60.9708	9.74	96.86	1228.81	0.807714	169.639	1.75139	59.0239	5.13367	4.57327	7.1138	-0.213547	4.07794	0.560407	hubei	2.27624	4.1104	0.0456022	0	0	0	0	0	0	0	0	0	0	0	1	0	0	0	0	0	0	0
hubei	2013	27.5731	3.74	107.82	1479.28	0.758604	125.581	1.16473	40.6962	4.83295	4.68046	7.29931	-0.276276	3.70614	0.152487	hubei	1.31909	3.31684	0.0763284	0	0	0	0	0	0	0	0	0	0	0	0	1	0	0	0	0	0	0
hubei	2014	15.2154	4.29	106.29	1475.28	0.713573	129.088	1.21449	40.9154	4.8605	4.66617	7.2966	-0.337471	3.71151	0.194326	hubei	1.45629	2.72231	0.113886	0	0	0	0	0	0	0	0	0	0	0	0	0	1	0	0	0	0	0
hubei	2015	21.1766	11.16	96.2	1471.01	0.699601	111.674	1.16085	34.8692	4.71558	4.56643	7.29371	-0.357245	3.5516	0.149156	hubei	2.41234	3.0529	0.127624	0	0	0	0	0	0	0	0	0	0	0	0	0	0	1	0	0	0	0
hubei	2016	6.68165	3.06	87.47	1343.38	0.694761	114.106	1.30452	34.3373	4.73713	4.4713	7.20294	-0.364187	3.53623	0.265835	hubei	1.11841	1.89936	0.132632	0	0	0	0	0	0	0	0	0	0	0	0	0	0	0	1	0	0	0
hubei	2017	35.1795	6.47	77.56	1194.61	0.646067	113.276	1.4605	32.2648	4.72983	4.35105	7.08558	-0.436852	3.47398	0.378777	hubei	1.86718	3.56047	0.19084	0	0	0	0	0	0	0	0	0	0	0	0	0	0	0	0	1	0	0
hubei	2018	22.3534	2.42	76.5	652.92	0.562618	102.489	1.33973	26.7246	4.62976	4.33729	6.48145	-0.575154	3.28559	0.292467	hubei	0.883768	3.10698	0.330802	0	0	0	0	0	0	0	0	0	0	0	0	0	0	0	0	0	1	0
hubei	2019	3.48035	1.97	85.8	794.16	0.529509	98.9115	1.15281	24.5393	4.59423	4.45202	6.67729	-0.635805	3.20028	0.142207	hubei	0.678033	1.24713	0.404248	0	0	0	0	0	0	0	0	0	0	0	0	0	0	0	0	0	0	1
hunan	2000	1.03342	3.93	82.42	3.2	0.866657	129.893	1.57599	44.7842	4.86671	4.41183	1.16315	-0.143112	3.80186	0.454886	hunan	1.36864	0.0328778	0.0204809	0	0	0	0	0	0	0	0	0	0	0	0	0	0	0	0	0	0	0
hunan	2001	-4.48666	14.2	89.76	3.36	0.896776	152.588	1.69996	54.7948	5.02774	4.49714	1.21194	-0.108949	4.00359	0.530603	hunan	2.65324		0.0118698	1	0	0	0	0	0	0	0	0	0	0	0	0	0	0	0	0	0	0
hunan	2002	47.5506	8.6	93.4	5.18	0.899549	166.204	1.77948	59.6148	5.11321	4.53689	1.64481	-0.105861	4.0879	0.576323	hunan	2.15176	3.86179	0.0112066	0	1	0	0	0	0	0	0	0	0	0	0	0	0	0	0	0	0	0
hunan	2003	0.516712	0.82	107.18	5.64	0.922374	177.811	1.65899	64.9476	5.18072	4.67451	1.72988	-0.0808045	4.17358	0.506211	hunan	-0.198451	-0.660269	0.0065294	0	0	1	0	0	0	0	0	0	0	0	0	0	0	0	0	0	0	0
hunan	2004	8.75658	3.27	117.43	7.85	0.906341	200.73	1.70936	71.4725	5.30196	4.76584	2.06051	-0.0983398	4.26931	0.536117	hunan	1.18479	2.16981	0.0096707	0	0	0	1	0	0	0	0	0	0	0	0	0	0	0	0	0	0	0
hunan	2005	17.1088	8.04	125.68	373.69	0.855606	412.939	3.28564	146.289	6.0233	4.83374	5.92343	-0.155945	4.98558	1.18956	hunan	2.08443	2.83959	0.0243188	0	0	0	0	1	0	0	0	0	0	0	0	0	0	0	0	0	0	0
hunan	2006	-1.03342	0.96	142.9	585.77	0.910491	531.489	3.71931	195.454	6.27568	4.96214	6.37293	-0.0937714	5.27532	1.31354	hunan	-0.040822		0.0087931	0	0	0	0	0	1	0	0	0	0	0	0	0	0	0	0	0	0	0
hunan	2007	0.775068	2.11	160.89	775.78	0.856247	557.679	3.46621	199.693	6.32378	5.08072	6.65387	-0.155196	5.29678	1.24306	hunan	0.746688	-0.254804	0.0240859	0	0	0	0	0	0	1	0	0	0	0	0	0	0	0	0	0	0	0
hunan	2008	11.8453	5.58	185.13	960.01	0.85466	589.103	3.1821	201.642	6.3786	5.22106	6.86694	-0.157052	5.30649	1.15754	hunan	1.71919	2.47193	0.0246652	0	0	0	0	0	0	0	1	0	0	0	0	0	0	0	0	0	0	0
hunan	2009	81.8125	19.61	224.25	1055.33	0.86097	551.282	2.45833	194.173	6.31225	5.41276	6.96161	-0.149696	5.26875	0.899484	hunan	2.97604	4.40443	0.0224088	0	0	0	0	0	0	0	0	1	0	0	0	0	0	0	0	0	0	0
hunan	2010	4.13475	8.72	259.59	1604.76	0.842871	546.088	2.10366	195.062	6.30278	5.5591	7.38073	-0.170942	5.27332	0.743677	hunan	2.16562	1.41943	0.029221	0	0	0	0	0	0	0	0	0	1	0	0	0	0	0	0	0	0	0
hunan	2011	44.8391	16.95	266.33	2309.24	0.76617	493.06	1.85131	167.967	6.20063	5.58474	7.74467	-0.266351	5.12377	0.615895	hunan	2.83027	3.80308	0.0709428	0	0	0	0	0	0	0	0	0	0	1	0	0	0	0	0	0	0	0
hunan	2012	6.03076	8.36	276.22	2287.98	0.840305	460.23	1.66617	162.114	6.13173	5.6212	7.73543	-0.17399	5.0883	0.510529	hunan	2.12346	1.79687	0.0302726	0	0	0	0	0	0	0	0	0	0	0	1	0	0	0	0	0	0	0
hunan	2013	7.21164	1.45	301.37	2625.22	0.583199	349.69	1.16033	112.687	5.85705	5.70834	7.87292	-0.539226	4.72461	0.148708	hunan	0.371564	1.9757	0.290765	0	0	0	0	0	0	0	0	0	0	0	0	1	0	0	0	0	0	0
hunan	2014	48.6896	16.49	299.37	2781.84	0.530445	329.534	1.10076	94.0731	5.79768	5.70168	7.93087	-0.634039	4.54407	0.0960004	hunan	2.80275	3.88546	0.402005	0	0	0	0	0	0	0	0	0	0	0	0	0	1	0	0	0	0	0
hunan	2015	62.2894	15.34	267.46	2715.97	0.551236	339.964	1.27108	93.2489	5.82884	5.58897	7.9069	-0.595592	4.53527	0.239868	hunan	2.73046	4.13179	0.35473	0	0	0	0	0	0	0	0	0	0	0	0	0	0	1	0	0	0	0
hunan	2016	6.52704	3.69	226.71	2767.6	0.898442	502.962	2.21853	188.593	6.22051	5.42367	7.92574	-0.107093	5.23959	0.796844	hunan	1.30563	1.87595	0.011469	0	0	0	0	0	0	0	0	0	0	0	0	0	0	0	1	0	0	0
hunan	2017	135.254	23.41	205.62	2720.28	0.334944	375.33	1.82536	71.0249	5.92781	5.32603	7.90849	-1.09379	4.26303	0.601777	hunan	3.15316	4.90715	1.19638	0	0	0	0	0	0	0	0	0	0	0	0	0	0	0	0	1	0	0
hunan	2018	9.38478	9.62	166.8	2208.29	0.518932	258.688	1.55089	64.7551	5.55562	5.1168	7.69997	-0.655982	4.17061	0.438828	hunan	2.26384	2.23909	0.430313	0	0	0	0	0	0	0	0	0	0	0	0	0	0	0	0	0	1	0
hunan	2019	-0.024132	0.24	193.9	1942.35	0.431788	236.671	1.22058	58.0837	5.46667	5.26734	7.57165	-0.839821	4.06189	0.199328	hunan	-1.42712		0.7053	0	0	0	0	0	0	0	0	0	0	0	0	0	0	0	0	0	0	1
gansu	2000	1.60574	2.19	70.15		0.468915	152.308	2.17117	38.6552	5.0259	4.25064		-0.757334	3.65468	0.775266	gansu	0.783902	0.473586	0.573554	0	0	0	0	0	0	0	0	0	0	0	0	0	0	0	0	0	0	0
gansu	2001	3.9781	9.3	67.52	105.147	0.503172	149.171	2.20929	38.6477	5.00509	4.21242	4.65536	-0.686824	3.65449	0.792671	gansu	2.23001	1.3808	0.471727	1	0	0	0	0	0	0	0	0	0	0	0	0	0	0	0	0	0	0
gansu	2002	1.83365	4.12	80.51	114.459	0.56639	138.556	1.72098	39.1727	4.93128	4.38838	4.74022	-0.568473	3.66798	0.542894	gansu	1.41585	0.60631	0.323162	0	1	0	0	0	0	0	0	0	0	0	0	0	0	0	0	0	0	0
gansu	2003	3.36688	0.62	95.21	161.68	0.565168	149.241	1.56749	40.838	5.00556	4.55609	5.08562	-0.570632	3.70961	0.449476	gansu	-0.478036	1.21399	0.32562	0	0	1	0	0	0	0	0	0	0	0	0	0	0	0	0	0	0	0
gansu	2004	0.404025	2.25	103.4		0.473692	132.314	1.27963	36.0411	4.88518	4.63861		-0.747197	3.58466	0.246572	gansu	0.81093	-0.906278	0.558304	0	0	0	1	0	0	0	0	0	0	0	0	0	0	0	0	0	0	0
gansu	2005	5.07622	4.8	117.93	319.78	0.460772	155.478	1.31839	42.9255	5.0465	4.77009	5.76763	-0.774852	3.75947	0.27641	gansu	1.56862	1.62457	0.600395	0	0	0	0	1	0	0	0	0	0	0	0	0	0	0	0	0	0	0
gansu	2006	2.62098	1.27	130.96	506.49	0.422058	141.371	1.0795	38.446	4.95139	4.87489	6.2275	-0.862613	3.64925	0.0764967	gansu	0.239017	0.96355	0.744101	0	0	0	0	0	1	0	0	0	0	0	0	0	0	0	0	0	0	0
gansu	2007	2.47595	1.53	142.76	662.051	0.479631	160.012	1.12085	43.9467	5.07525	4.96117	6.49534	-0.734737	3.78298	0.114085	gansu	0.425268	0.906624	0.539839	0	0	0	0	0	0	1	0	0	0	0	0	0	0	0	0	0	0	0
gansu	2008	1.00488	4.43	166.06	769.673	0.584536	247.87	1.49265	79.466	5.5129	5.11235	6.64597	-0.536937	4.37533	0.400554	gansu	1.4884	0.0048716	0.288301	0	0	0	0	0	0	0	1	0	0	0	0	0	0	0	0	0	0	0
gansu	2009	18.0257	9.32	172.64	871.687	0.599881	269.166	1.55912	88.0554	5.59533	5.15121	6.77043	-0.511024	4.47797	0.444121	gansu	2.23216	2.8918	0.261145	0	0	0	0	0	0	0	0	1	0	0	0	0	0	0	0	0	0	0
gansu	2010	2.57955	6.87	195.53	1194.39	0.334139	488.254	2.49708	92.697	6.19083	5.27571	7.08539	-1.0962	4.52933	0.915121	gansu	1.92716	0.947614	1.20165	0	0	0	0	0	0	0	0	0	1	0	0	0	0	0	0	0	0	0
gansu	2011	3.46011	6.38	211.71	1529.06	0.629093	287.192	1.35654	93.5876	5.66015	5.35522	7.33241	-0.463476	4.5389	0.304934	gansu	1.85317	1.2413	0.21481	0	0	0	0	0	0	0	0	0	0	1	0	0	0	0	0	0	0	0
gansu	2012	-2.80746	6.64	294.1	2174.34	0.407547	518.107	1.76167	112.43	6.25018	5.68392	7.68448	-0.8976	4.72233	0.566263	gansu	1.89311		0.805686	0	0	0	0	0	0	0	0	0	0	0	1	0	0	0	0	0	0	0
gansu	2013	1.01524	1.07	323.69	2603.26	0.362359	630.203	1.94693	121.07	6.44604	5.77979	7.86452	-1.01512	4.79636	0.666256	gansu	0.0676587	0.0151282	1.03047	0	0	0	0	0	0	0	0	0	0	0	0	1	0	0	0	0	0	0
gansu	2014	6.76483	5.57	347.66	2929.55	0.304841	606.72	1.74515	102.711	6.40807	5.85123	7.9826	-1.18796	4.63192	0.556843	gansu	1.7174	1.91174	1.41126	0	0	0	0	0	0	0	0	0	0	0	0	0	1	0	0	0	0	0
gansu	2015	1.10848	6.68	381.36	3469.26	0.327363	488.697	1.28146	88.612	6.19174	5.94374	8.1517	-1.11668	4.48427	0.247999	gansu	1.89912	0.102989	1.24698	0	0	0	0	0	0	0	0	0	0	0	0	0	0	1	0	0	0	0
gansu	2016	1.06704	3.37	374.59	3084.7	0.477676	532.412	1.42132	133.856	6.27742	5.92583	8.03421	-0.738823	4.89676	0.351585	gansu	1.21491	0.0648897	0.545859	0	0	0	0	0	0	0	0	0	0	0	0	0	0	0	1	0	0	0
gansu	2017	23.5474	13.17	398.56	3403.1	0.635275	373.034	0.935953	102.948	5.92167	5.98786	8.13244	-0.453697	4.63423	-0.0661896	gansu	2.57794	3.15902	0.205841	0	0	0	0	0	0	0	0	0	0	0	0	0	0	0	0	1	0	0
gansu	2018	8.46381	4.37	410.52	3562.09	0.291508	388.248	0.945747	64.7775	5.96164	6.01743	8.1781	-1.23269	4.17096	-0.0557798	gansu	1.47476	2.1358	1.51952	0	0	0	0	0	0	0	0	0	0	0	0	0	0	0	0	0	1	0
gansu	2019	0.062158	0.11	329	1752.77	0.363822	461.092	1.4015	89.9134	6.1336	5.79606	7.46895	-1.01109	4.49885	0.33754	gansu	-2.20728	-2.77808	1.0223	0	0	0	0	0	0	0	0	0	0	0	0	0	0	0	0	0	0	1
fujian	2000	5.41033	7.18	3.45		0.145536	6.39358	1.85321	0.562412	1.85529	1.23837		-1.92733	-0.57552	0.61692	fujian	1.9713	1.68831	3.71461	0	0	0	0	0	0	0	0	0	0	0	0	0	0	0	0	0	0	0
fujian	2001	1.16515	6.23	3.66	38.9523	0.385018	7.75729	2.11948	1.79197	2.04863	1.29746	3.66234	-0.954466	0.583316	0.75117	fujian	1.82938	0.152847	0.911005	1	0	0	0	0	0	0	0	0	0	0	0	0	0	0	0	0	0	0
fujian	2002	4.57953	8.65	3.66	42.2386	0.137846	11.9628	3.26851	0.921829	2.4818	1.29746	3.74333	-1.98162	-0.0813956	1.18434	fujian	2.15756	1.5216	3.92682	0	1	0	0	0	0	0	0	0	0	0	0	0	0	0	0	0	0	0
fujian	2003	0.091185	1.15	3.38	54.2734	0.340228	36.1856	10.7058	5.78326	3.58866	1.21788	3.99403	-1.07814	1.75497	2.37079	fujian	0.139762	-2.39486	1.16239	0	0	1	0	0	0	0	0	0	0	0	0	0	0	0	0	0	0	0
fujian	2004	5.56231	5.46	5.15		0.215497	32.1927	6.25101	3.43089	3.47174	1.639		-1.53481	1.23282	1.83274	fujian	1.69745	1.71601	2.35564	0	0	0	1	0	0	0	0	0	0	0	0	0	0	0	0	0	0	0
fujian	2005	1.22594	8.4	6.04	109.48	0.162714	36.9981	6.12552	2.96263	3.61087	1.7984	4.69574	-1.81576	1.08608	1.81246	fujian	2.12823	0.203706	3.29698	0	0	0	0	1	0	0	0	0	0	0	0	0	0	0	0	0	0	0
fujian	2006	-0.131712	4.15	8.22	175.068	0.102827	43.402	5.28005	2.16948	3.77051	2.10657	5.16517	-2.27471	0.774486	1.66394	fujian	1.42311		5.1743	0	0	0	0	0	1	0	0	0	0	0	0	0	0	0	0	0	0	0
fujian	2007	22.229	14.3	9.6	243.953	0.187084	66.7856	6.95683	5.90598	4.20149	2.26176	5.49697	-1.6762	1.77597	1.93972	fujian	2.66026	3.1014	2.80964	0	0	0	0	0	0	1	0	0	0	0	0	0	0	0	0	0	0	0
fujian	2008	5.85613	4.16	11.07	308.442	0.122928	39.5243	3.5704	2.49256	3.67692	2.40424	5.73153	-2.09616	0.91331	1.27268	fujian	1.42552	1.76749	4.39388	0	0	0	0	0	0	0	1	0	0	0	0	0	0	0	0	0	0	0
fujian	2009	0.111449	0.13	11.13	293.872	0.147792	26.6693	2.39616	2.21529	3.28351	2.40964	5.68314	-1.91195	0.795382	0.873869	fujian	-2.04022	-2.19419	3.65555	0	0	0	0	0	0	0	0	1	0	0	0	0	0	0	0	0	0	0
fujian	2010	1.32725	4.79	13.67	439.512	0.161348	52.3275	3.82791	5.22148	3.95752	2.6152	6.08566	-1.82419	1.65278	1.34232	fujian	1.56653	0.283112	3.32767	0	0	0	0	0	0	0	0	0	1	0	0	0	0	0	0	0	0	0
fujian	2011	4.73151	10.44	22.36	703.009	0.170949	67.7253	3.02886	6.87917	4.21546	3.10727	6.55537	-1.76639	1.9285	1.10819	fujian	2.34564	1.55424	3.12012	0	0	0	0	0	0	0	0	0	0	1	0	0	0	0	0	0	0	0
fujian	2012	4.14387	12.46	33.26	800.42	0.213166	71.9978	2.1647	9.02439	4.27663	3.50435	6.68514	-1.54569	2.19993	0.77228	fujian	2.52252	1.42163	2.38914	0	0	0	0	0	0	0	0	0	0	0	1	0	0	0	0	0	0	0
fujian	2013	4.29585	1.42	40.5	924.273	0.301537	123.866	3.05843	20.0127	4.8192	3.7013	6.82901	-1.19886	2.99637	1.1179	fujian	0.350657	1.45765	1.43727	0	0	0	0	0	0	0	0	0	0	0	0	1	0	0	0	0	0	0
fujian	2014	2.61398	4.91	38.84	1159.96	0.576535	282.29	7.26802	72.9483	5.64293	3.65945	7.05614	-0.550719	4.28975	1.98348	fujian	1.59127	0.960875	0.303291	0	0	0	0	0	0	0	0	0	0	0	0	0	1	0	0	0	0	0
fujian	2015	0.982776	8.19	40.91	1289.3	0.623563	326.824	7.98886	91.7522	5.78942	3.71137	7.16186	-0.472305	4.51909	2.07805	fujian	2.10291	-0.017374	0.223072	0	0	0	0	0	0	0	0	0	0	0	0	0	0	1	0	0	0	0
fujian	2016	1.16515	1.5	45.59	1406.55	0.629646	326.596	7.16375	93.569	5.78872	3.81969	7.2489	-0.462598	4.5387	1.96903	fujian	0.405465	0.152847	0.213997	0	0	0	0	0	0	0	0	0	0	0	0	0	0	0	1	0	0	0
fujian	2017	0.871327	5.04	46.21		0.317094	358.083	7.74904	33.5786	5.88077	3.8332		-1.14856	3.51389	2.04757	fujian	1.61741	-0.137738	1.31919	0	0	0	0	0	0	0	0	0	0	0	0	0	0	0	0	1	0	0
fujian	2018	3.88045	1.85	47.76	2200.15	0.711273	443.373	9.28336	132.137	6.09441	3.86619	7.69628	-0.340699	4.88384	2.22822	fujian	0.615186	1.35595	0.116076	0	0	0	0	0	0	0	0	0	0	0	0	0	0	0	0	0	1	0
fujian	2019	0.344478	2.24	73.41	2440.31	0.721611	462.633	6.30204	138.969	6.13693	4.29606	7.79988	-0.326269	4.93425	1.84087	fujian	0.806476	-1.06572	0.106451	0	0	0	0	0	0	0	0	0	0	0	0	0	0	0	0	0	0	1
guizhou	2000	5.36561	2.69	36.07		0.630966	69.9578	1.9395	18.7486	4.24789	3.58546		-0.460504	2.93112	0.66243	guizhou	0.989541	1.68001	0.212064	0	0	0	0	0	0	0	0	0	0	0	0	0	0	0	0	0	0	0
guizhou	2001	10.8853	9.8325	36.76	45.0686	0.624067	69.0436	1.87823	18.3409	4.23474	3.60441	3.80819	-0.471498	2.90913	0.630327	guizhou	2.28569	2.38742	0.222311	1	0	0	0	0	0	0	0	0	0	0	0	0	0	0	0	0	0	0
guizhou	2002	7.12481	5.44	45.17	59.8786	0.638823	73.9773	1.63775	20.1154	4.30376	3.81043	4.09232	-0.448128	3.00148	0.493325	guizhou	1.69378	1.96358	0.200818	0	1	0	0	0	0	0	0	0	0	0	0	0	0	0	0	0	0	0
guizhou	2003	2.00501	0.622	55.41	78.6456	0.643496	96.2745	1.73749	26.5163	4.5672	4.01476	4.36495	-0.44084	3.27776	0.552443	guizhou	-0.474815	0.695651	0.19434	0	0	1	0	0	0	0	0	0	0	0	0	0	0	0	0	0	0	0
guizhou	2004	4.42204	2.8912	58.59		0.703134	121.274	2.06987	36.4418	4.79805	4.07056		-0.352208	3.59572	0.727487	guizhou	1.06167	1.4866	0.12405	0	0	0	1	0	0	0	0	0	0	0	0	0	0	0	0	0	0	0
guizhou	2005	7.03093	4.985	60.34	104.41	0.716442	132.618	2.19784	40.4548	4.88747	4.09999	4.64832	-0.333457	3.70019	0.787475	guizhou	1.60643	1.95032	0.111194	0	0	0	0	1	0	0	0	0	0	0	0	0	0	0	0	0	0	0
guizhou	2006	1.66176	1.1267	71.7	147.547	0.723137	156.872	2.1879	47.9929	5.05543	4.27249	4.99415	-0.324157	3.87105	0.782942	guizhou	0.119293	0.50788	0.105078	0	0	0	0	0	1	0	0	0	0	0	0	0	0	0	0	0	0	0
guizhou	2007	0.561855	1.6893	85.19	172.469	0.372425	150.035	1.76118	41.1117	5.01087	4.44488	5.15022	-0.987719	3.71629	0.565986	guizhou	0.524314	-0.576511	0.975588	0	0	0	0	0	0	1	0	0	0	0	0	0	0	0	0	0	0	0
guizhou	2008	6.63372	4.0075	62.78	140.087	0.35355	125.288	1.99567	34.1463	4.83061	4.13964	4.94226	-1.03973	3.53065	0.690977	guizhou	1.38817	1.89217	1.08104	0	0	0	0	0	0	0	1	0	0	0	0	0	0	0	0	0	0	0
guizhou	2009	54.8462	14.3308	85.38	174.93	0.403378	133.223	1.56035	38.4184	4.89202	4.44711	5.16439	-0.907881	3.64854	0.444911	guizhou	2.66241	4.00453	0.824248	0	0	0	0	0	0	0	0	1	0	0	0	0	0	0	0	0	0	0
guizhou	2010	16.5274	8.5491	93.28	207.711	0.364541	139.099	1.4912	39.6828	4.93519	4.53561	5.33615	-1.00912	3.68092	0.399583	guizhou	2.14583	2.80502	1.01832	0	0	0	0	0	0	0	0	0	1	0	0	0	0	0	0	0	0	0
guizhou	2011	8.80054	7.32	94.55	252.528	0.404813	158.634	1.67778	46.1784	5.0666	4.54913	5.53152	-0.90433	3.83251	0.517473	guizhou	1.99061	2.17481	0.817813	0	0	0	0	0	0	0	0	0	0	1	0	0	0	0	0	0	0	0
guizhou	2012	14.8542	6.0028	110.61	297.834	0.56069	164.506	1.48726	62.2116	5.10295	4.70601	5.69654	-0.578586	4.13054	0.396934	guizhou	1.79223	2.69828	0.334762	0	0	0	0	0	0	0	0	0	0	0	1	0	0	0	0	0	0	0
guizhou	2013	2.0947	0.9528	119.87	367.455	0.404508	129.356	1.07913	47.1152	4.86257	4.78641	5.9066	-0.905085	3.8526	0.0761595	guizhou	-0.0483503	0.73941	0.819179	0	0	0	0	0	0	0	0	0	0	0	0	1	0	0	0	0	0	0
guizhou	2014	21.2609	6.21	71.89	357.23	0.47492	115.757	1.6102	46.61	4.7515	4.27514	5.87838	-0.74461	3.84182	0.47636	guizhou	1.82616	3.05687	0.554444	0	0	0	0	0	0	0	0	0	0	0	0	0	1	0	0	0	0	0
guizhou	2015	19.1551	4.5913	91.41	376.22	0.418052	102.048	1.11638	40.9685	4.62545	4.51535	5.93017	-0.872149	3.7128	0.110093	guizhou	1.52416	2.95257	0.760644	0	0	0	0	0	0	0	0	0	0	0	0	0	0	1	0	0	0	0
guizhou	2016	1.56398	2.905	96.75	430.06	0.35663	93.0533	0.961791	36.961	4.53317	4.57213	6.06393	-1.03106	3.60986	-0.0389579	guizhou	1.06643	0.447235	1.06307	0	0	0	0	0	0	0	0	0	0	0	0	0	0	0	1	0	0	0
guizhou	2017	62.1647	10.17	109.35		0.321464	84.7466	0.775003	39.5027	4.43966	4.69455		-1.13487	3.67637	-0.254888	guizhou	2.31944	4.12979	1.28793	0	0	0	0	0	0	0	0	0	0	0	0	0	0	0	0	1	0	0
guizhou	2018	19.2385	6.25	132.69		0.350076	81.0167	0.610572	30.8427	4.39466	4.88802		-1.0496	3.4289	-0.49336	guizhou	1.83258	2.95691	1.10167	0	0	0	0	0	0	0	0	0	0	0	0	0	0	0	0	0	1	0
guizhou	2019	0.017226	0.1	155.08	513.2	0.399056	85.3102	0.550104	33.1763	4.44629	5.04394	6.24066	-0.918654	3.50184	-0.597648	guizhou	-2.30259	-4.06133	0.843926	0	0	0	0	0	0	0	0	0	0	0	0	0	0	0	0	0	0	1
liaoning	2000	16.5829	5.69	52.82	111.9	0.929672	3277.61	62.0524	1123.17	8.09487	3.96689	4.71761	-0.0729233	7.02391	4.12798	liaoning	1.73871	2.80837	0.0053178	0	0	0	0	0	0	0	0	0	0	0	0	0	0	0	0	0	0	0
liaoning	2001	86.6547	17.53	51.5	116.86	0.926126	3231.19	62.7416	1092.21	8.08061	3.94158	4.76098	-0.0767449	6.99596	4.13903	liaoning	2.86391	4.46193	0.0058898	1	0	0	0	0	0	0	0	0	0	0	0	0	0	0	0	0	0	0
liaoning	2002	26.5201	9.47	41.19	137.04	0.997928	3302.05	80.1664	1163.66	8.1023	3.7182	4.92027	-0.0020745	7.05933	4.3841	liaoning	2.24813	3.2779	4.3e-06	0	1	0	0	0	0	0	0	0	0	0	0	0	0	0	0	0	0	0
liaoning	2003	39.9096	4.65	45.22	157.79	0.767098	84.3652	1.86566	27.9383	4.43515	3.81154	5.06126	-0.265141	3.33	0.623616	liaoning	1.53687	3.68662	0.0702996	0	0	1	0	0	0	0	0	0	0	0	0	0	0	0	0	0	0	0
liaoning	2004	4.01957	3.75	52.15	220.93	0.56308	85.2262	1.63425	26.0044	4.44531	3.95412	5.39785	-0.574333	3.25827	0.491185	liaoning	1.32176	1.39118	0.329858	0	0	0	1	0	0	0	0	0	0	0	0	0	0	0	0	0	0	0
liaoning	2005	61.1459	11.4	47.04	285.08	0.61654	93.4675	1.98698	29.718	4.53761	3.851	5.65277	-0.483632	3.39175	0.686615	liaoning	2.43361	4.11326	0.2339	0	0	0	0	1	0	0	0	0	0	0	0	0	0	0	0	0	0	0
liaoning	2006	9.66129	3.09	53.38	438.39	0.656944	123.45	2.31267	41.3342	4.81584	3.97744	6.08311	-0.420156	3.72169	0.838401	liaoning	1.12817	2.26813	0.176531	0	0	0	0	0	1	0	0	0	0	0	0	0	0	0	0	0	0	0
liaoning	2007	18.6063	8.56	59.72	559.12	0.70295	205.397	3.43933	64.4835	5.32494	4.08967	6.32636	-0.352469	4.16641	1.23528	liaoning	2.1471	2.9235	0.124234	0	0	0	0	0	0	1	0	0	0	0	0	0	0	0	0	0	0	0
liaoning	2008	20.3162	3.51	58.94	660.71	0.694763	205.44	3.48557	61.1418	5.32515	4.07652	6.49331	-0.364185	4.1132	1.24863	liaoning	1.25562	3.01142	0.132631	0	0	0	0	0	0	0	1	0	0	0	0	0	0	0	0	0	0	0
liaoning	2009	1.34031	1.91	59.01	821.02	0.699397	240.517	4.07586	73.0242	5.48279	4.07771	6.71055	-0.357536	4.29079	1.40508	liaoning	0.647103	0.292899	0.127832	0	0	0	0	0	0	0	0	1	0	0	0	0	0	0	0	0	0	0
liaoning	2010	5.83279	2.62	75.49	970.32	0.690581	235.171	3.11526	75.8143	5.46031	4.324	6.87763	-0.370222	4.32829	1.13631	liaoning	0.963174	1.7635	0.137064	0	0	0	0	0	0	0	0	0	1	0	0	0	0	0	0	0	0	0
liaoning	2011	52.9398	15.02	76.63	1075.26	0.663579	264.039	3.44563	82.3377	5.5761	4.33899	6.98032	-0.410108	4.41083	1.23711	liaoning	2.70938	3.96916	0.168188	0	0	0	0	0	0	0	0	0	0	1	0	0	0	0	0	0	0	0
liaoning	2012	103.91	10.82	71.32	1201.19	0.524389	224.386	3.14618	67.1444	5.41337	4.26718	7.09107	-0.645522	4.20685	1.14619	liaoning	2.3814	4.64352	0.416699	0	0	0	0	0	0	0	0	0	0	0	1	0	0	0	0	0	0	0
liaoning	2013	5.24106	0.57	73.3	1457.42	0.515985	190.778	2.6027	51.9823	5.25111	4.29456	7.28442	-0.661677	3.9509	0.956551	liaoning	-0.562119	1.65652	0.437816	0	0	0	0	0	0	0	0	0	0	0	0	1	0	0	0	0	0	0
liaoning	2014	12.4501	2.64	67.04	1383.46	0.423286	215.055	3.20787	48.5653	5.37089	4.20529	7.23234	-0.859708	3.88291	1.16561	liaoning	0.970779	2.52173	0.739098	0	0	0	0	0	0	0	0	0	0	0	0	0	1	0	0	0	0	0
liaoning	2015	36.0901	9.32	91.68	831.19	0.314739	185.684	2.02535	35.8573	5.22405	4.5183	6.72286	-1.15601	3.57955	0.705743	liaoning	2.23216	3.58602	1.33636	0	0	0	0	0	0	0	0	0	0	0	0	0	0	1	0	0	0	0
liaoning	2016	13.0977	1.27	92.75	527.28	0.361532	141.634	1.52706	34.7341	4.95325	4.52991	6.26773	-1.0174	3.54772	0.423341	liaoning	0.239017	2.57243	1.03511	0	0	0	0	0	0	0	0	0	0	0	0	0	0	0	1	0	0	0
liaoning	2017	4.72889	2.69	98.9	750.2	0.73225	189.451	1.91558	93.0387	5.24413	4.59411	6.62034	-0.311633	4.53302	0.65002	liaoning	0.989541	1.55369	0.0971154	0	0	0	0	0	0	0	0	0	0	0	0	0	0	0	0	1	0	0
liaoning	2018	29.7214	6.1	108.56	895.59	0.34031	205.978	1.89736	41.4725	5.32777	4.6873	6.79748	-1.0779	3.72503	0.640465	liaoning	1.80829	3.39187	1.16186	0	0	0	0	0	0	0	0	0	0	0	0	0	0	0	0	0	1	0
liaoning	2019	175.212	20.18	127.76	1288.4	0.263518	170.876	1.33748	31.1648	5.14094	4.85015	7.16116	-1.33363	3.43929	0.290786	liaoning	3.00469	5.16599	1.77858	0	0	0	0	0	0	0	0	0	0	0	0	0	0	0	0	0	0	1
chonqing	2000	-2.37653	4.91	5.2	0.7396	0.664056	77.3652	14.8779	24.6799	4.34854	1.64866	-0.301646	-0.409389	3.20599	2.69988	chonqing	1.59127		0.167599	0	0	0	0	0	0	0	0	0	0	0	0	0	0	0	0	0	0	0
chonqing	2001	71.0257	15.16	5.47	32.987	0.590477	42.7634	7.81781	12.1121	3.75568	1.69928	3.49611	-0.526825	2.4942	2.0564	chonqing	2.71866	4.26304	0.277544	1	0	0	0	0	0	0	0	0	0	0	0	0	0	0	0	0	0	0
chonqing	2002	28.9197	6.34	6.56	37.5279	0.715156	61.6904	9.40402	20.5247	4.12213	1.88099	3.62509	-0.335255	3.02163	2.24114	chonqing	1.84688	3.36452	0.112396	0	1	0	0	0	0	0	0	0	0	0	0	0	0	0	0	0	0	0
chonqing	2003	25.2748	4.83	7.72	52.0378	0.681886	56.3835	7.30357	18.0514	4.03218	2.04381	3.95197	-0.382893	2.89323	1.98836	chonqing	1.57485	3.22981	0.146607	0	0	1	0	0	0	0	0	0	0	0	0	0	0	0	0	0	0	0
chonqing	2004	69.0348	11.33	10.45	79.3187	0.268818	24.1395	2.31	3.57713	3.18385	2.3466	4.37348	-1.31372	1.27456	0.837248	chonqing	2.42745	4.23461	1.72586	0	0	0	1	0	0	0	0	0	0	0	0	0	0	0	0	0	0	0
chonqing	2005	126.843	13.86	10.8	117.853	0.301139	35.2605	3.26486	7.01519	3.56276	2.37955	4.76944	-1.20018	1.94808	1.18322	chonqing	2.62901	4.84295	1.44044	0	0	0	0	1	0	0	0	0	0	0	0	0	0	0	0	0	0	0
chonqing	2006	9.46179	2.69	13.28	213.104	0.381246	51.8443	3.90394	12.1062	3.94825	2.58626	5.36178	-0.964311	2.49372	1.36199	chonqing	0.989541	2.24726	0.929897	0	0	0	0	0	1	0	0	0	0	0	0	0	0	0	0	0	0	0
chonqing	2007	164.054	22.99	15.71	269.249	0.413699	64.6701	4.11649	15.9234	4.1693	2.7543	5.59564	-0.882617	2.76779	1.415	chonqing	3.13506	5.1002	0.779013	0	0	0	0	0	0	1	0	0	0	0	0	0	0	0	0	0	0	0
chonqing	2008	25.7239	7.6	16.83	283.495	0.567804	96.3564	5.72528	28.5516	4.56805	2.82316	5.64719	-0.565979	3.35171	1.74489	chonqing	2.02815	3.24742	0.320332	0	0	0	0	0	0	0	1	0	0	0	0	0	0	0	0	0	0	0
chonqing	2009	1.33807	0.09	28.96	274.157	0.516195	82.6861	2.85518	23.3023	4.41505	3.36592	5.6137	-0.661271	3.14855	1.04914	chonqing	-2.40795	0.291226	0.43728	0	0	0	0	0	0	0	0	1	0	0	0	0	0	0	0	0	0	0
chonqing	2010	13.2683	4.23	25.84	357.752	0.790774	191.329	7.40439	69.0556	5.254	3.25192	5.87984	-0.234743	4.23491	2.00207	chonqing	1.4422	2.58537	0.0551041	0	0	0	0	0	0	0	0	0	1	0	0	0	0	0	0	0	0	0
chonqing	2011	32.5882	13.52	34.22	421.249	0.759029	232.635	6.79823	81.541	5.44947	3.53281	6.04322	-0.275715	4.40111	1.91666	chonqing	2.60417	3.48395	0.0760188	0	0	0	0	0	0	0	0	0	0	1	0	0	0	0	0	0	0	0
chonqing	2012	20.0464	6.26	30.56	439.016	0.781793	259.915	8.50507	92.4947	5.56036	3.41969	6.08454	-0.246165	4.52715	2.14066	chonqing	1.83418	2.99805	0.0605973	0	0	0	0	0	0	0	0	0	0	0	1	0	0	0	0	0	0	0
chonqing	2013	108.592	6.75	34	503.712	0.715913	243.351	7.1574	81.5602	5.49451	3.52636	6.22201	-0.334197	4.40134	1.96815	chonqing	1.90954	4.68759	0.111687	0	0	0	0	0	0	0	0	0	0	0	0	1	0	0	0	0	0	0
chonqing	2014	13.3141	1.9	62.82	589.066	0.858424	390.263	6.2124	149.398	5.96682	4.14027	6.37854	-0.152658	5.00662	1.82655	chonqing	0.641854	2.58882	0.0233043	0	0	0	0	0	0	0	0	0	0	0	0	0	1	0	0	0	0	0
chonqing	2015	26.8383	6.63	65.28	634.432	0.855495	378.1	5.79198	144.923	5.93516	4.17869	6.45273	-0.156075	4.9762	1.75647	chonqing	1.8916	3.28983	0.0243595	0	0	0	0	0	0	0	0	0	0	0	0	0	0	1	0	0	0	0
chonqing	2016	16.9679	3.18	60.92	731.237	0.712443	231.967	3.80773	82.3777	5.4466	4.10956	6.59474	-0.339056	4.41132	1.33703	chonqing	1.15688	2.83132	0.114959	0	0	0	0	0	0	0	0	0	0	0	0	0	0	0	1	0	0	0
chonqing	2017	39.9868	8.21	60.19	663.999	0.769309	260.964	4.33566	61.197	5.56438	4.09751	6.49828	-0.262262	4.1141	1.46687	chonqing	2.10535	3.68855	0.0687815	0	0	0	0	0	0	0	0	0	0	0	0	0	0	0	0	1	0	0
chonqing	2018	-24.4925	2.94	57.67	581.069	0.642515	246.615	4.27632	79.6203	5.50783	4.05474	6.36487	-0.442365	4.37727	1.45309	chonqing	1.07841		0.195687	0	0	0	0	0	0	0	0	0	0	0	0	0	0	0	0	0	1	0
chonqing	2019	8.47081	0.83	62.21	694.28	0.594405	245.985	3.95411	77.7825	5.50527	4.13052	6.54288	-0.520194	4.35392	1.37476	chonqing	-0.18633	2.13663	0.270602	0	0	0	0	0	0	0	0	0	0	0	0	0	0	0	0	0	0	1
shanxi	2000	12.0504	5.57	10.98	36.9025	0.721057	120.41	10.9663	37.2486	4.7909	2.39608	3.60828	-0.327037	3.61761	2.39482	shanxi	1.7174	2.4891	0.106954	0	0	0	0	0	0	0	0	0	0	0	0	0	0	0	0	0	0	0
shanxi	2001	62.6708	19.12	12.3	34.6007	0.808289	164.7	13.3903	57.0136	5.10413	2.5096	3.54387	-0.212835	4.04329	2.59453	shanxi	2.95073	4.1379	0.0452987	1	0	0	0	0	0	0	0	0	0	0	0	0	0	0	0	0	0	0
shanxi	2002	-0.109062	9.15	18.46	42.4173	0.792087	198.002	10.726	66.9992	5.28828	2.91561	3.74756	-0.233084	4.20468	2.37267	shanxi	2.21375		0.0543281	0	1	0	0	0	0	0	0	0	0	0	0	0	0	0	0	0	0	0
shanxi	2003	40.4219	5.8	24.34	58.3368	0.925172	179.349	7.36848	69.6894	5.18933	3.19212	4.06623	-0.0777756	4.24405	1.99721	shanxi	1.75786	3.69937	0.0060491	0	0	1	0	0	0	0	0	0	0	0	0	0	0	0	0	0	0	0
shanxi	2004	4.36738	2.56	27.91	77.2868	0.92304	246.456	8.83037	96.6879	5.50718	3.32898	4.34752	-0.0800825	4.57149	2.1782	shanxi	0.940007	1.47416	0.0064132	0	0	0	1	0	0	0	0	0	0	0	0	0	0	0	0	0	0	0
shanxi	2005	53.4104	11.06	30.33	110.996	0.9314	343.485	11.3249	136.065	5.83914	3.41214	4.7095	-0.0710661	4.91313	2.42701	shanxi	2.40334	3.97801	0.0050504	0	0	0	0	1	0	0	0	0	0	0	0	0	0	0	0	0	0	0
shanxi	2006	15.3287	3.17	51.76	179.93	0.856683	279.582	5.40151	102.41	5.6333	3.94662	5.19257	-0.154687	4.62899	1.68668	shanxi	1.15373	2.72973	0.0239281	0	0	0	0	0	1	0	0	0	0	0	0	0	0	0	0	0	0	0
shanxi	2007	47.6762	9.55	59.85	265.52	0.870242	332.634	5.5578	122.832	5.80704	4.09184	5.58169	-0.138984	4.81082	1.7152	shanxi	2.25654	3.86443	0.0193165	0	0	0	0	0	0	1	0	0	0	0	0	0	0	0	0	0	0	0
shanxi	2008	-5.07086	3.81	75.61	334.955	0.879855	318.373	4.21073	118.861	5.76323	4.32559	5.814	-0.127998	4.77796	1.43764	shanxi	1.33763		0.0163835	0	0	0	0	0	0	0	1	0	0	0	0	0	0	0	0	0	0	0
shanxi	2009	1.37816	1.11	89.61	470.956	0.496156	104.818	1.16972	22.9936	4.65223	4.49547	6.15477	-0.700866	3.13522	0.156763	shanxi	0.10436	0.320746	0.491213	0	0	0	0	0	0	0	0	1	0	0	0	0	0	0	0	0	0	0
shanxi	2010	5.87361	2.08	112.74	694.058	0.853726	358.328	3.17836	128.16	5.88145	4.72508	6.54256	-0.158145	4.85328	1.15637	shanxi	0.732368	1.77047	0.0250098	0	0	0	0	0	0	0	0	0	1	0	0	0	0	0	0	0	0	0
shanxi	2011	-4.59249	13.59	129.59	932.451	0.385685	48.9282	0.377562	9.15397	3.89036	4.86438	6.83782	-0.952735	2.21419	-0.974021	shanxi	2.60933		0.907703	0	0	0	0	0	0	0	0	0	0	1	0	0	0	0	0	0	0	0
shanxi	2012	37.4437	11.02	124.29	1243.18	0.819037	282.246	2.27087	99.2705	5.64278	4.82262	7.12542	-0.199626	4.59785	0.820162	shanxi	2.39971	3.62284	0.0398506	0	0	0	0	0	0	0	0	0	0	0	1	0	0	0	0	0	0	0
shanxi	2013	1.24943	0.56	159.61	1376.24	0.861187	261.806	1.64029	95.0213	5.56761	5.07273	7.22711	-0.149443	4.5541	0.494872	shanxi	-0.579819	0.222688	0.0223333	0	0	0	0	0	0	0	0	0	0	0	0	1	0	0	0	0	0	0
shanxi	2014	-11.8675	3.19	204.74	1445.19	0.789221	310.999	1.51899	106.013	5.73979	5.32174	7.276	-0.236709	4.66356	0.418048	shanxi	1.16002		0.0560311	0	0	0	0	0	0	0	0	0	0	0	0	0	1	0	0	0	0	0
shanxi	2015	12.1069	6.54	200.69	1617.9	0.751474	222.763	1.10999	71.9889	5.40611	5.30176	7.38888	-0.285718	4.27651	0.104348	shanxi	1.87794	2.49378	0.0816349	0	0	0	0	0	0	0	0	0	0	0	0	0	0	1	0	0	0	0
shanxi	2016	51.0205	2.1	229.38	1778.85	0.769649	192.234	0.838058	63.1407	5.25871	5.43538	7.48372	-0.26182	4.14536	-0.176668	shanxi	0.741937	3.93223	0.0685499	0	0	0	0	0	0	0	0	0	0	0	0	0	0	0	1	0	0	0
shanxi	2017	-9.27412	2.68	232.6	1682.95	0.073476	186.747	0.802867	11.554	5.22975	5.44932	7.42831	-2.61079	2.44703	-0.219566	shanxi	0.985817		6.81623	0	0	0	0	0	0	0	0	0	0	0	0	0	0	0	0	1	0	0
shanxi	2018	12.9658	7.15	197.88	1465.59	0.714287	226.757	1.14593	70.5448	5.42388	5.28766	7.29001	-0.33647	4.25625	0.136217	shanxi	1.96711	2.56231	0.113212	0	0	0	0	0	0	0	0	0	0	0	0	0	0	0	0	0	1	0
shanxi	2019	278.043	23.47	205.4	1377.34	0.762038	349.58	1.70195	116.092	5.85673	5.32496	7.22791	-0.271759	4.75438	0.531773	shanxi	3.15572	5.62778	0.0738531	0	0	0	0	0	0	0	0	0	0	0	0	0	0	0	0	0	0	1
qinghai	2000	14.8495	5.89	29.8		0.20444	25.1808	0.844993	2.44465	3.22608	3.39451		-1.58748	0.893901	-0.168427	qinghai	1.77326	2.69797	2.52009	0	0	0	0	0	0	0	0	0	0	0	0	0	0	0	0	0	0	0
qinghai	2001	85.2064	19.26	32.01	36.8091	0.270967	20.5056	0.640601	2.55324	3.0207	3.46605	3.60575	-1.30576	0.937365	-0.445348	qinghai	2.95803	4.44508	1.70501	1	0	0	0	0	0	0	0	0	0	0	0	0	0	0	0	0	0	0
qinghai	2002	15.9549	9.3873	37	42.9453	0.314091	17.2213	0.465442	2.50486	2.84615	3.61092	3.75993	-1.15807	0.918232	-0.764768	qinghai	2.23936	2.76977	1.34113	0	1	0	0	0	0	0	0	0	0	0	0	0	0	0	0	0	0	0
qinghai	2003	52.2896	5.4	43.9	53.8457	0.107367	19.1011	0.435105	2.96967	2.94975	3.78191	3.98612	-2.2315	1.08845	-0.832168	qinghai	1.6864	3.9568	4.97961	0	0	1	0	0	0	0	0	0	0	0	0	0	0	0	0	0	0	0
qinghai	2004	15.1695	3.772	60.66		0.226683	24.6489	0.406345	6.41222	3.20473	4.10529		-1.4842	1.85821	-0.900552	qinghai	1.3276	2.71929	2.20285	0	0	0	1	0	0	0	0	0	0	0	0	0	0	0	0	0	0	0
qinghai	2005	30.414	11.06	72.49	107.2	0.192775	18.6817	0.257715	5.36378	2.92755	4.28345	4.6747	-1.64623	1.67967	-1.3559	qinghai	2.40334	3.4149	2.71008	0	0	0	0	1	0	0	0	0	0	0	0	0	0	0	0	0	0	0
qinghai	2006	3.87066	2.9	88.69	186.476	0.269379	33.5063	0.377791	10.5683	3.51173	4.48515	5.2283	-1.31164	2.35786	-0.973414	qinghai	1.06471	1.35342	1.72039	0	0	0	0	0	1	0	0	0	0	0	0	0	0	0	0	0	0	0
qinghai	2007	44.7417	9.0941	107.89	188.259	0.265467	32.36	0.299935	10.2476	3.47692	4.68111	5.23782	-1.32627	2.32704	-1.20419	qinghai	2.20763	3.80091	1.75898	0	0	0	0	0	0	1	0	0	0	0	0	0	0	0	0	0	0	0
qinghai	2008	8.02065	3.5179	113.32	274.565	0.172462	47.8967	0.422667	11.4844	3.86905	4.73022	5.61519	-1.75758	2.44099	-0.86117	qinghai	1.25786	2.08202	3.08908	0	0	0	0	0	0	0	1	0	0	0	0	0	0	0	0	0	0	0
qinghai	2009	1.5116	1.3296	106.8	304.375	0.747034	169.017	1.58256	62.812	5.13	4.67096	5.71826	-0.291645	4.14015	0.459044	qinghai	0.284878	0.413166	0.0850566	0	0	0	0	0	0	0	0	1	0	0	0	0	0	0	0	0	0	0
qinghai	2010	6.54931	2.43	159.54	447.486	0.63814	89.0693	0.558288	29.3651	4.48942	5.0723	6.10365	-0.449198	3.37981	-0.58288	qinghai	0.887891	1.87936	0.201779	0	0	0	0	0	0	0	0	0	1	0	0	0	0	0	0	0	0	0
qinghai	2011	10.1101	15.99	182.74	404.077	0.284332	143.582	0.78572	50.1939	4.96691	5.20807	6.0016	-1.25761	3.91589	-0.241155	qinghai	2.77196	2.31354	1.58159	0	0	0	0	0	0	0	0	0	0	1	0	0	0	0	0	0	0	0
qinghai	2012	83.4434	11.32	215.76	478.079	0.236998	116.495	0.53993	34.7901	4.75785	5.37417	6.16977	-1.43971	3.54933	-0.616316	qinghai	2.42657	4.42417	2.07275	0	0	0	0	0	0	0	0	0	0	0	1	0	0	0	0	0	0	0
qinghai	2013	2.19063	0.57	237.39	552.409	0.286545	115.763	0.487648	33.6766	4.75154	5.4697	6.31429	-1.24986	3.5168	-0.718162	qinghai	-0.562119	0.78419	1.56215	0	0	0	0	0	0	0	0	0	0	0	0	1	0	0	0	0	0	0
qinghai	2014	8.92626	2.83	246.81	637.39	0.211021	95.3552	0.386351	25.2648	4.55761	5.50862	6.45738	-1.5558	3.22941	-0.95101	qinghai	1.04028	2.189	2.42051	0	0	0	0	0	0	0	0	0	0	0	0	0	1	0	0	0	0	0
qinghai	2015	26.7018	8.23	230.61	627.18	0.133652	73.7386	0.319754	16.8008	4.30053	5.44073	6.44123	-2.01252	2.82143	-1.1402	qinghai	2.10779	3.28473	4.05023	0	0	0	0	0	0	0	0	0	0	0	0	0	0	1	0	0	0	0
qinghai	2016	29.4154	1.83	232.73	590.947	0.103149	74.4357	0.319837	14.7563	4.30994	5.44988	6.38173	-2.27158	2.69167	-1.13994	qinghai	0.604316	3.38152	5.16008	0	0	0	0	0	0	0	0	0	0	0	0	0	0	0	1	0	0	0
qinghai	2017	0.615409	3.26	238.12	534.92	0.033408	70.2731	0.295116	3.11435	4.25239	5.47278	6.28212	-3.39897	1.13602	-1.22039	qinghai	1.18173	-0.485468	11.553	0	0	0	0	0	0	0	0	0	0	0	0	0	0	0	0	1	0	0
qinghai	2018	29.8981	6.85	249.56	560.956	0.114061	70.2098	0.281334	12.1294	4.25149	5.5197	6.32964	-2.17103	2.49564	-1.26821	qinghai	1.92425	3.39779	4.71335	0	0	0	0	0	0	0	0	0	0	0	0	0	0	0	0	0	1	0
qinghai	2019	217.875	21.47	250.93	655.626	0.104878	71.7751	0.286036	11.8659	4.27354	5.52517	6.48559	-2.25496	2.47367	-1.25164	qinghai	3.06666	5.38392	5.08483	0	0	0	0	0	0	0	0	0	0	0	0	0	0	0	0	0	0	1
heilongjiang	2000	9.96999	4.12	3.47	14.4601	0.85907	26.163	7.53977	9.49067	3.26435	1.24415	2.67139	-0.151905	2.25031	2.02019	heilongjiang	1.41585	2.29958	0.0230751	0	0	0	0	0	0	0	0	0	0	0	0	0	0	0	0	0	0	0
heilongjiang	2001	23.5082	12.05	2.55	14.065	0.922	25.8159	10.1239	9.89106	3.25099	0.936093	2.64369	-0.0812105	2.29163	2.3149	heilongjiang	2.48907	3.15735	0.0065951	1	0	0	0	0	0	0	0	0	0	0	0	0	0	0	0	0	0	0
heilongjiang	2002	36.9228	9.64	2.72	13.716	0.917129	25.3762	9.3295	9.7457	3.23381	1.00063	2.61856	-0.0865074	2.27683	2.23318	heilongjiang	2.26592	3.60883	0.0074835	0	1	0	0	0	0	0	0	0	0	0	0	0	0	0	0	0	0	0
heilongjiang	2003	23.5213	2.8	3.03	14.1891	0.952437	27.7538	9.15967	10.837	3.32337	1.10856	2.65247	-0.0487312	2.38296	2.21481	heilongjiang	1.02962	3.15791	0.0023747	0	0	1	0	0	0	0	0	0	0	0	0	0	0	0	0	0	0	0
heilongjiang	2004	19.86	4.09	1.51	17.2741	0.949019	28.0107	18.5501	10.8481	3.33259	0.41211	2.84921	-0.0523261	2.38399	2.92048	heilongjiang	1.40854	2.98871	0.002738	0	0	0	1	0	0	0	0	0	0	0	0	0	0	0	0	0	0	0
heilongjiang	2005	13.1196	8.82	1.12	21.6712	0.959004	28.6234	25.5566	11.1749	3.35423	0.113329	3.07599	-0.04186	2.41367	3.2409	heilongjiang	2.17702	2.5741	0.0017523	0	0	0	0	1	0	0	0	0	0	0	0	0	0	0	0	0	0	0
heilongjiang	2006	5.28298	2.15	0.78	24.8652	0.935751	32.3216	41.438	12.2112	3.47574	-0.248461	3.21347	-0.0664062	2.50235	3.7242	heilongjiang	0.765468	1.66449	0.0044098	0	0	0	0	0	1	0	0	0	0	0	0	0	0	0	0	0	0	0
heilongjiang	2007	28.6576	5.99	0.84	27.939	0.629801	27.1226	32.2888	7.59921	3.30037	-0.174353	3.33002	-0.462351	2.02804	3.47472	heilongjiang	1.79009	3.35542	0.213768	0	0	0	0	0	0	1	0	0	0	0	0	0	0	0	0	0	0	0
heilongjiang	2008	24.985	2.32	0.77	38.855	0.704844	28.2388	36.6737	8.73942	3.3407	-0.261365	3.65984	-0.34978	2.16784	3.60206	heilongjiang	0.841567	3.21828	0.122346	0	0	0	0	0	0	0	1	0	0	0	0	0	0	0	0	0	0	0
heilongjiang	2009	3.03715	1.86	0.6	41.6071	0.781455	41.698	69.4966	13.4697	3.73045	-0.510826	3.72827	-0.246597	2.60044	4.24128	heilongjiang	0.620576	1.11092	0.0608103	0	0	0	0	0	0	0	0	1	0	0	0	0	0	0	0	0	0	0
heilongjiang	2010	5.80053	4.19	0.31	42.2795	0.569189	23.9152	77.1458	6.23286	3.17451	-1.17118	3.7443	-0.563543	1.82984	4.3457	heilongjiang	1.4327	1.75795	0.317581	0	0	0	0	0	0	0	0	0	1	0	0	0	0	0	0	0	0	0
heilongjiang	2011	55.3956	18.7	0.32	43.275	0.946027	146.336	457.301	59.7062	4.98591	-1.13943	3.76757	-0.0554842	4.08944	6.12534	heilongjiang	2.92852	4.0145	0.0030785	0	0	0	0	0	0	0	0	0	0	1	0	0	0	0	0	0	0	0
heilongjiang	2012	59.4653	7.24	0.01	47.7335	0.922812	336.378	33637.8	135.698	5.81823	-4.60517	3.86563	-0.08033	4.91043	10.4234	heilongjiang	1.97962	4.08539	0.0064529	0	0	0	0	0	0	0	0	0	0	0	1	0	0	0	0	0	0	0
heilongjiang	2013	1.059	0.76	0.15	57.5222	0.550912	18.1449	120.966	4.75557	2.89839	-1.89712	4.05217	-0.596181	1.55932	4.79551	heilongjiang	-0.274437	0.0573208	0.355432	0	0	0	0	0	0	0	0	0	0	0	0	1	0	0	0	0	0	0
heilongjiang	2014	10.3206	2.17	0.08	49.2039	0.551945	18.1366	226.708	4.76097	2.89793	-2.52573	3.89597	-0.594306	1.56045	5.42366	heilongjiang	0.774727	2.33414	0.3532	0	0	0	0	0	0	0	0	0	0	0	0	0	1	0	0	0	0	0
heilongjiang	2015	28.7878	6.67	0.1	51.8502	0.661686	20.1442	201.442	6.22155	3.00291	-2.30259	3.94836	-0.412964	1.82802	5.3055	heilongjiang	1.89762	3.35995	0.170539	0	0	0	0	0	0	0	0	0	0	0	0	0	0	1	0	0	0	0
heilongjiang	2016	0.665198	0.66	0.04	53.1678	0.733615	23.3344	583.361	8.00016	3.14993	-3.21888	3.97345	-0.309771	2.07946	6.36881	heilongjiang	-0.415515	-0.40767	0.0959582	0	0	0	0	0	0	0	0	0	0	0	0	0	0	0	1	0	0	0
heilongjiang	2017	4.22002	2.12	0.03		0.591278	157.534	5251.13	102.066	5.05964	-3.50656		-0.525469	4.62561	8.5662	heilongjiang	0.751416	1.43984	0.276118	0	0	0	0	0	0	0	0	0	0	0	0	0	0	0	0	1	0	0
heilongjiang	2018	12.3699	4.99			0.024303	172.191		2.48477	5.1486			-3.71716	0.910179		heilongjiang	1.60744	2.51527	13.8173	0	0	0	0	0	0	0	0	0	0	0	0	0	0	0	0	0	1	0
heilongjiang	2019	75.4424	17.16	2.32	92.0544	0.022394	265.007	114.227	3.52331	5.57976	0.841567	4.52238	-3.79895	1.2594	4.73819	heilongjiang	2.84258	4.32337	14.432	0	0	0	0	0	0	0	0	0	0	0	0	0	0	0	0	0	0	1
